# Supplementary material
Source: MDPI journal article supplement (https://www.mdpi.com/2227-7102/13/11/1145)
Supplement: s1 [file s1]

GET

FILE='F:\Supplemental Instruction 2018 Conference Paper.sav'.  
DATASET NAME DataSet1 WINDOW=FRONT.  
DATASET ACTIVATE DataSet1.

SAVE OUTFILE='F:\Supplemental Instruction 2018 Conference Paper.sav'  
/COMPRESSED.  
FREQUENCIES VARIABLES=A1 A2 A3  
/ORDER=ANALYSIS.

## Frequencies

[DataSet1] F:\Supplemental Instruction 2018 Conference Paper.sav

### Statistics

|   |         | Please indicate<br>your Faculty | Indicate the<br>number of<br>modules for<br>which SI<br>sessions were<br>attended in<br>your First Year<br>of study | Please indicate<br>the year of<br>study that you<br>are currently in |
|---|---------|---------------------------------|---------------------------------------------------------------------------------------------------------------------|----------------------------------------------------------------------|
| N | Valid   | 120                             | 121                                                                                                                 | 121                                                                  |
|   | Missing | 2                               | 1                                                                                                                   | 1                                                                    |

## Frequency Table

### Please indicate your Faculty

|         |                                 | Frequency | Percent | Valid Percent | Cumulative<br>Percent |
|---------|---------------------------------|-----------|---------|---------------|-----------------------|
| Valid   | Science & Agriculture           | 47        | 38.5    | 39.2          | 39.2                  |
|         | Social Sciences &<br>humanities | 48        | 39.3    | 40.0          | 79.2                  |
|         | Education                       | 5         | 4.1     | 4.2           | 83.3                  |
|         | Management & Commerce           | 19        | 15.6    | 15.8          | 99.2                  |
|         | Health Sciences                 | 1         | .8      | .8            | 100.0                 |
|         | Total                           | 120       | 98.4    | 100.0         |                       |
| Missing | System                          | 2         | 1.6     |               |                       |
| Total   |                                 | 122       | 100.0   |               |                       |

**Indicate the number of modules for which SI sessions were attended in your First Year of study**

|         |        | Frequency | Percent | Valid Percent | Cumulative Percent |
|---------|--------|-----------|---------|---------------|--------------------|
| Valid   | One    | 39        | 32.0    | 32.2          | 32.2               |
|         | Two    | 49        | 40.2    | 40.5          | 72.7               |
|         | Three  | 12        | 9.8     | 9.9           | 82.6               |
|         | Four   | 21        | 17.2    | 17.4          | 100.0              |
|         | Total  | 121       | 99.2    | 100.0         |                    |
| Missing | System | 1         | .8      |               |                    |
| Total   |        | 122       | 100.0   |               |                    |

**Please indicate the year of study that you are currently in**

|         |          | Frequency | Percent | Valid Percent | Cumulative Percent |
|---------|----------|-----------|---------|---------------|--------------------|
| Valid   | 1st year | 5         | 4.1     | 4.1           | 4.1                |
|         | 2nd year | 94        | 77.0    | 77.7          | 81.8               |
|         | 3rd year | 16        | 13.1    | 13.2          | 95.0               |
|         | 4th year | 6         | 4.9     | 5.0           | 100.0              |
|         | Total    | 121       | 99.2    | 100.0         |                    |
| Missing | System   | 1         | .8      |               |                    |
| Total   |          | 122       | 100.0   |               |                    |

FREQUENCIES VARIABLES=B4 B5 B6 B7 B8 B9 B10 B11 B12 B13 B14  
/ORDER=ANALYSIS.

## **Frequencies**

## **Statistics**

|   |         | The SI leaders' facilitation methods enhanced understanding of concepts | The lecturer's attitude towards SI fostered my attendance of the SI sessions | The scheduling of the SI sessions ensured availability and accessibility of the students | The monitoring of SI attendance by the lecturers encouraged my attendance to the SI sessions | The student-SI leader relationship created an atmosphere conducive for learning |
|---|---------|-------------------------------------------------------------------------|------------------------------------------------------------------------------|------------------------------------------------------------------------------------------|----------------------------------------------------------------------------------------------|---------------------------------------------------------------------------------|
| N | Valid   | 121                                                                     | 118                                                                          | 120                                                                                      | 120                                                                                          | 121                                                                             |
|   | Missing | 1                                                                       | 4                                                                            | 2                                                                                        | 2                                                                                            | 1                                                                               |

### Statistics

|   |         | The session venues allowed space for peer collaboration and transactional learning | The SI sessions were characterised by engagement, sharing and exchange of ideas | The SI leader followed me up and kept track of my progress and performance | The SI sessions focused on the mastery of the subject outcomes | My classmates encouraged me to attend SI sessions |
|---|---------|------------------------------------------------------------------------------------|---------------------------------------------------------------------------------|----------------------------------------------------------------------------|----------------------------------------------------------------|---------------------------------------------------|
| N | Valid   | 120                                                                                | 119                                                                             | 116                                                                        | 117                                                            | 117                                               |
|   | Missing | 2                                                                                  | 3                                                                               | 6                                                                          | 5                                                              | 5                                                 |

### Statistics

|   |         | My individual learning needs were accommodated in the SI sessions |
|---|---------|-------------------------------------------------------------------|
| N | Valid   | 119                                                               |
|   | Missing | 3                                                                 |

### Frequency Table

#### The SI leaders' facilitation methods enhanced understanding of concepts

|         |                   | Frequency | Percent | Valid Percent | Cumulative Percent |
|---------|-------------------|-----------|---------|---------------|--------------------|
| Valid   | Strongly Agree    | 47        | 38.5    | 38.8          | 38.8               |
|         | Agree             | 69        | 56.6    | 57.0          | 95.9               |
|         | Disagree          | 3         | 2.5     | 2.5           | 98.3               |
|         | Strongly Disagree | 2         | 1.6     | 1.7           | 100.0              |
|         | Total             | 121       | 99.2    | 100.0         |                    |
| Missing | System            | 1         | .8      |               |                    |
| Total   |                   | 122       | 100.0   |               |                    |

**The lecturer's attitude towards SI fostered my attendance of the SI sessions**

|         |                   | Frequency | Percent | Valid Percent | Cumulative Percent |
|---------|-------------------|-----------|---------|---------------|--------------------|
| Valid   | Strongly Agree    | 28        | 23.0    | 23.7          | 23.7               |
|         | Agree             | 57        | 46.7    | 48.3          | 72.0               |
|         | Disagree          | 27        | 22.1    | 22.9          | 94.9               |
|         | Strongly Disagree | 6         | 4.9     | 5.1           | 100.0              |
|         | Total             | 118       | 96.7    | 100.0         |                    |
| Missing | System            | 4         | 3.3     |               |                    |
| Total   |                   | 122       | 100.0   |               |                    |

**The scheduling of the SI sessions ensured availability and accessibility of the students**

|         |                   | Frequency | Percent | Valid Percent | Cumulative Percent |
|---------|-------------------|-----------|---------|---------------|--------------------|
| Valid   | Strongly Agree    | 37        | 30.3    | 30.8          | 30.8               |
|         | Agree             | 74        | 60.7    | 61.7          | 92.5               |
|         | Disagree          | 3         | 2.5     | 2.5           | 95.0               |
|         | Strongly Disagree | 6         | 4.9     | 5.0           | 100.0              |
|         | Total             | 120       | 98.4    | 100.0         |                    |
| Missing | System            | 2         | 1.6     |               |                    |
| Total   |                   | 122       | 100.0   |               |                    |

**The monitoring of SI attendance by the lecturers encouraged my attendance to the SI sessions**

|         |                   | Frequency | Percent | Valid Percent | Cumulative Percent |
|---------|-------------------|-----------|---------|---------------|--------------------|
| Valid   | Strongly Agree    | 35        | 28.7    | 29.2          | 29.2               |
|         | Agree             | 62        | 50.8    | 51.7          | 80.8               |
|         | Disagree          | 17        | 13.9    | 14.2          | 95.0               |
|         | Strongly Disagree | 6         | 4.9     | 5.0           | 100.0              |
|         | Total             | 120       | 98.4    | 100.0         |                    |
| Missing | System            | 2         | 1.6     |               |                    |
| Total   |                   | 122       | 100.0   |               |                    |



**The student-SI leader relation ship created an atmosphere conducive for learning**

|         |                   | Frequency | Percent | Valid Percent | Cumulative Percent |
|---------|-------------------|-----------|---------|---------------|--------------------|
| Valid   | Strongly Agree    | 41        | 33.6    | 33.9          | 33.9               |
|         | Agree             | 68        | 55.7    | 56.2          | 90.1               |
|         | Disagree          | 7         | 5.7     | 5.8           | 95.9               |
|         | Strongly Disagree | 5         | 4.1     | 4.1           | 100.0              |
|         | Total             | 121       | 99.2    | 100.0         |                    |
| Missing | System            | 1         | .8      |               |                    |
| Total   |                   | 122       | 100.0   |               |                    |

**The session venues allowed space for peer collaboration and transactional learning**

|         |                   | Frequency | Percent | Valid Percent | Cumulative Percent |
|---------|-------------------|-----------|---------|---------------|--------------------|
| Valid   | Strongly Agree    | 44        | 36.1    | 36.7          | 36.7               |
|         | Agree             | 61        | 50.0    | 50.8          | 87.5               |
|         | Disagree          | 11        | 9.0     | 9.2           | 96.7               |
|         | Strongly Disagree | 4         | 3.3     | 3.3           | 100.0              |
|         | Total             | 120       | 98.4    | 100.0         |                    |
| Missing | System            | 2         | 1.6     |               |                    |
| Total   |                   | 122       | 100.0   |               |                    |

**The SI sessions were characterised by engagement, sharing and exchange of ideas**

|         |                   | Frequency | Percent | Valid Percent | Cumulative Percent |
|---------|-------------------|-----------|---------|---------------|--------------------|
| Valid   | Strongly Agree    | 52        | 42.6    | 43.7          | 43.7               |
|         | Agree             | 61        | 50.0    | 51.3          | 95.0               |
|         | Disagree          | 5         | 4.1     | 4.2           | 99.2               |
|         | Strongly Disagree | 1         | .8      | .8            | 100.0              |
|         | Total             | 119       | 97.5    | 100.0         |                    |
| Missing | System            | 3         | 2.5     |               |                    |
| Total   |                   | 122       | 100.0   |               |                    |

**The SI leader followed me up and kept track of my progress and performance**

|         |                   | Frequency | Percent | Valid Percent | Cumulative Percent |
|---------|-------------------|-----------|---------|---------------|--------------------|
| Valid   | Strongly Agree    | 37        | 30.3    | 31.9          | 31.9               |
|         | Agree             | 41        | 33.6    | 35.3          | 67.2               |
|         | Disagree          | 30        | 24.6    | 25.9          | 93.1               |
|         | Strongly Disagree | 8         | 6.6     | 6.9           | 100.0              |
|         | Total             | 116       | 95.1    | 100.0         |                    |
| Missing | System            | 6         | 4.9     |               |                    |
| Total   |                   | 122       | 100.0   |               |                    |

**The SI sessions focused on the mastery of the subject outcomes**

|         |                   | Frequency | Percent | Valid Percent | Cumulative Percent |
|---------|-------------------|-----------|---------|---------------|--------------------|
| Valid   | Strongly Agree    | 37        | 30.3    | 31.6          | 31.6               |
|         | Agree             | 71        | 58.2    | 60.7          | 92.3               |
|         | Disagree          | 6         | 4.9     | 5.1           | 97.4               |
|         | Strongly Disagree | 3         | 2.5     | 2.6           | 100.0              |
|         | Total             | 117       | 95.9    | 100.0         |                    |
| Missing | System            | 5         | 4.1     |               |                    |
| Total   |                   | 122       | 100.0   |               |                    |

**My classmates encouraged me to attend SI sessions**

|         |                   | Frequency | Percent | Valid Percent | Cumulative Percent |
|---------|-------------------|-----------|---------|---------------|--------------------|
| Valid   | Strongly Agree    | 19        | 15.6    | 16.2          | 16.2               |
|         | Agree             | 43        | 35.2    | 36.8          | 53.0               |
|         | Disagree          | 36        | 29.5    | 30.8          | 83.8               |
|         | Strongly Disagree | 19        | 15.6    | 16.2          | 100.0              |
|         | Total             | 117       | 95.9    | 100.0         |                    |
| Missing | System            | 5         | 4.1     |               |                    |
| Total   |                   | 122       | 100.0   |               |                    |

### My individual learning needs were accomodated in the SI sessions

|         |                   | Frequency | Percent | Valid Percent | Cumulative Percent |
|---------|-------------------|-----------|---------|---------------|--------------------|
| Valid   | Strongly Agree    | 35        | 28.7    | 29.4          | 29.4               |
|         | Agree             | 66        | 54.1    | 55.5          | 84.9               |
|         | Disagree          | 13        | 10.7    | 10.9          | 95.8               |
|         | Strongly Disagree | 5         | 4.1     | 4.2           | 100.0              |
|         | Total             | 119       | 97.5    | 100.0         |                    |
| Missing | System            | 3         | 2.5     |               |                    |
| Total   |                   | 122       | 100.0   |               |                    |

FREQUENCIES VARIABLES=C15 C16 C17 C18 C19 C20 C21  
/ORDER=ANALYSIS.

### Frequencies

#### Statistics

|   |         | I acquired academic literacies and competencies such as scientific reading and writing as a result of attendance to the SI sessions | My marks for the various assessment tasks (assignments, tests and examinations) improved as a result of attendance to the SI sessions | The sessions unlocked, exposed and unpacked difficult areas in the content subjects | The SI sessions offered a sense of community and belonging to the discipline and the university | SI attendance enabled assimilation into the culture and ethos of the university |
|---|---------|-------------------------------------------------------------------------------------------------------------------------------------|---------------------------------------------------------------------------------------------------------------------------------------|-------------------------------------------------------------------------------------|-------------------------------------------------------------------------------------------------|---------------------------------------------------------------------------------|
| N | Valid   | 119                                                                                                                                 | 119                                                                                                                                   | 119                                                                                 | 116                                                                                             | 113                                                                             |
|   | Missing | 3                                                                                                                                   | 3                                                                                                                                     | 3                                                                                   | 6                                                                                               | 9                                                                               |

## Statistics

|   |         |                                                                         |                                                                                                                    |
|---|---------|-------------------------------------------------------------------------|--------------------------------------------------------------------------------------------------------------------|
|   |         | I acquired study skills as a result of my attendance in the SI sessions | SI sessions developed graduate attributes such as responsibility, independent learning, self-monitoring, et cetera |
| N | Valid   | 119                                                                     | 119                                                                                                                |
|   | Missing | 3                                                                       | 3                                                                                                                  |

### Frequency Table

#### I acquired academic literacies and competencies such as scientific reading and writing as a result of attendance to the SI sessions

|         |                     | Frequency | Percent | Valid Percent | Cumulative Percent |
|---------|---------------------|-----------|---------|---------------|--------------------|
| Valid   | To a great extent   | 30        | 24.6    | 25.2          | 25.2               |
|         | Fairly well         | 72        | 59.0    | 60.5          | 85.7               |
|         | To a limited extent | 12        | 9.8     | 10.1          | 95.8               |
|         | Not at all          | 5         | 4.1     | 4.2           | 100.0              |
|         | Total               | 119       | 97.5    | 100.0         |                    |
| Missing | System              | 3         | 2.5     |               |                    |
| Total   |                     | 122       | 100.0   |               |                    |

#### My marks for the various assessment tasks (assignments, tests and examinations) improved as a result of attendance to the SI sessions

|         |                     | Frequency | Percent | Valid Percent | Cumulative Percent |
|---------|---------------------|-----------|---------|---------------|--------------------|
| Valid   | To a great extent   | 52        | 42.6    | 43.7          | 43.7               |
|         | Fairly well         | 47        | 38.5    | 39.5          | 83.2               |
|         | To a limited extent | 11        | 9.0     | 9.2           | 92.4               |
|         | Not at all          | 9         | 7.4     | 7.6           | 100.0              |
|         | Total               | 119       | 97.5    | 100.0         |                    |
| Missing | System              | 3         | 2.5     |               |                    |
| Total   |                     | 122       | 100.0   |               |                    |

**The sessions unlocked, exposed and unpacked difficult areas in the content subjects**

|         |                     | Frequency | Percent | Valid Percent | Cumulative Percent |
|---------|---------------------|-----------|---------|---------------|--------------------|
| Valid   | To a great extent   | 48        | 39.3    | 40.3          | 40.3               |
|         | Fairly well         | 53        | 43.4    | 44.5          | 84.9               |
|         | To a limited extent | 14        | 11.5    | 11.8          | 96.6               |
|         | Not at all          | 4         | 3.3     | 3.4           | 100.0              |
|         | Total               | 119       | 97.5    | 100.0         |                    |
| Missing | System              | 3         | 2.5     |               |                    |
| Total   |                     | 122       | 100.0   |               |                    |

**The SI sessions offered a sense of community and belonging to the discipline and the university**

|         |                     | Frequency | Percent | Valid Percent | Cumulative Percent |
|---------|---------------------|-----------|---------|---------------|--------------------|
| Valid   | To a great extent   | 33        | 27.0    | 28.4          | 28.4               |
|         | Fairly well         | 59        | 48.4    | 50.9          | 79.3               |
|         | To a limited extent | 21        | 17.2    | 18.1          | 97.4               |
|         | Not at all          | 3         | 2.5     | 2.6           | 100.0              |
|         | Total               | 116       | 95.1    | 100.0         |                    |
| Missing | System              | 6         | 4.9     |               |                    |
| Total   |                     | 122       | 100.0   |               |                    |

**SI attendance enabled assimilation into the culture and ethos of the university**

|         |                     | Frequency | Percent | Valid Percent | Cumulative Percent |
|---------|---------------------|-----------|---------|---------------|--------------------|
| Valid   | To a great extent   | 25        | 20.5    | 22.1          | 22.1               |
|         | Fairly well         | 47        | 38.5    | 41.6          | 63.7               |
|         | To a limited extent | 32        | 26.2    | 28.3          | 92.0               |
|         | Not at all          | 9         | 7.4     | 8.0           | 100.0              |
|         | Total               | 113       | 92.6    | 100.0         |                    |
| Missing | System              | 9         | 7.4     |               |                    |
| Total   |                     | 122       | 100.0   |               |                    |

**I acquired study skills as a result of my attendance in the SI sessions**

|         |                     | Frequency | Percent | Valid Percent | Cumulative Percent |
|---------|---------------------|-----------|---------|---------------|--------------------|
| Valid   | To a great extent   | 40        | 32.8    | 33.6          | 33.6               |
|         | Fairly well         | 55        | 45.1    | 46.2          | 79.8               |
|         | To a limited extent | 18        | 14.8    | 15.1          | 95.0               |
|         | Not at all          | 6         | 4.9     | 5.0           | 100.0              |
|         | Total               | 119       | 97.5    | 100.0         |                    |
| Missing | System              | 3         | 2.5     |               |                    |
| Total   |                     | 122       | 100.0   |               |                    |

**SI sessions developed graduate attributes such as responsibility, independent learning, self-monitoring, et cetera**

|         |                     | Frequency | Percent | Valid Percent | Cumulative Percent |
|---------|---------------------|-----------|---------|---------------|--------------------|
| Valid   | To a great extent   | 49        | 40.2    | 41.2          | 41.2               |
|         | Fairly well         | 54        | 44.3    | 45.4          | 86.6               |
|         | To a limited extent | 11        | 9.0     | 9.2           | 95.8               |
|         | Not at all          | 5         | 4.1     | 4.2           | 100.0              |
|         | Total               | 119       | 97.5    | 100.0         |                    |
| Missing | System              | 3         | 2.5     |               |                    |
| Total   |                     | 122       | 100.0   |               |                    |

PLUMC15 BY B4 B5 B6 B7 B8 B9 B10 B11 B12 B13 B14 WITHA1 A2 A3  
 /CRITERIA=CIN(95) DELTA(0) LCONVERGE(0) MXITER(100) MXSTER(5) PCONVERGE(1.0E-6)  
 SINGULAR(1.0E-8)  
 /LINK=LOGIT  
 /PRINT=FIT PARAMETERSUMMARY.

**PLUM - Ordinal Regression**

## Warnings

There are 321 (75.0%) cells (i.e., dependent variable levels by observed combinations of predictor variable values) with zero frequencies.

Unexpected singularities in the Fisher Information matrix are encountered. There may be a quasi-complete separation in the data. Some parameter estimates will tend to infinity.

The PLUM procedure continues despite the above warning(s). Subsequent results shown are based on the last iteration. Validity of the model fit is uncertain.

## Case Processing Summary

|                                                                                                                                     |                     | N  | Marginal Percentage |
|-------------------------------------------------------------------------------------------------------------------------------------|---------------------|----|---------------------|
| I acquired academic literacies and competencies such as scientific reading and writing as a result of attendance to the SI sessions | To a great extent   | 28 | 26.2%               |
|                                                                                                                                     | Fairly well         | 66 | 61.7%               |
|                                                                                                                                     | To a limited extent | 9  | 8.4%                |
|                                                                                                                                     | Not at all          | 4  | 3.7%                |
| The SI leaders' facilitation methods enhanced understanding of concepts                                                             | Strongly Agree      | 40 | 37.4%               |
|                                                                                                                                     | Agree               | 63 | 58.9%               |
|                                                                                                                                     | Disagree            | 3  | 2.8%                |
|                                                                                                                                     | Strongly Disagree   | 1  | 0.9%                |
| The lecturer's attitude towards SI fostered my attendance of the SI sessions                                                        | Strongly Agree      | 27 | 25.2%               |
|                                                                                                                                     | Agree               | 51 | 47.7%               |
|                                                                                                                                     | Disagree            | 25 | 23.4%               |
|                                                                                                                                     | Strongly Disagree   | 4  | 3.7%                |
| The scheduling of the SI sessions ensured availability and accessibility of the students                                            | Strongly Agree      | 35 | 32.7%               |
|                                                                                                                                     | Agree               | 65 | 60.7%               |
|                                                                                                                                     | Disagree            | 1  | 0.9%                |
|                                                                                                                                     | Strongly Disagree   | 6  | 5.6%                |
| The monitoring of SI attendance by the lecturers encouraged my attendance to the SI sessions                                        | Strongly Agree      | 29 | 27.1%               |
|                                                                                                                                     | Agree               | 57 | 53.3%               |
|                                                                                                                                     | Disagree            | 16 | 15.0%               |
|                                                                                                                                     | Strongly Disagree   | 5  | 4.7%                |
| The student-SI leader relationship created an atmosphere conducive for learning                                                     | Strongly Agree      | 35 | 32.7%               |
|                                                                                                                                     | Agree               | 63 | 58.9%               |
|                                                                                                                                     | Disagree            | 5  | 4.7%                |
|                                                                                                                                     | Strongly Disagree   | 4  | 3.7%                |



### Case Processing Summary

|                                                                                    |                   | N   | Marginal Percentage |
|------------------------------------------------------------------------------------|-------------------|-----|---------------------|
| The session venues allowed space for peer collaboration and transactional learning | Strongly Agree    | 41  | 38.3%               |
|                                                                                    | Agree             | 53  | 49.5%               |
|                                                                                    | Disagree          | 10  | 9.3%                |
|                                                                                    | Strongly Disagree | 3   | 2.8%                |
| The SI sessions were characterised by engagement, sharing and exchange of ideas    | Strongly Agree    | 46  | 43.0%               |
|                                                                                    | Agree             | 57  | 53.3%               |
|                                                                                    | Disagree          | 4   | 3.7%                |
| The SI leader followed me up and kept track of my progress and performance         | Strongly Agree    | 35  | 32.7%               |
|                                                                                    | Agree             | 35  | 32.7%               |
|                                                                                    | Disagree          | 29  | 27.1%               |
|                                                                                    | Strongly Disagree | 8   | 7.5%                |
| The SI sessions focused on the mastery of the subject outcomes                     | Strongly Agree    | 34  | 31.8%               |
|                                                                                    | Agree             | 66  | 61.7%               |
|                                                                                    | Disagree          | 6   | 5.6%                |
|                                                                                    | Strongly Disagree | 1   | 0.9%                |
| My classmates encouraged me to attend SI sessions                                  | Strongly Agree    | 17  | 15.9%               |
|                                                                                    | Agree             | 39  | 36.4%               |
|                                                                                    | Disagree          | 32  | 29.9%               |
|                                                                                    | Strongly Disagree | 19  | 17.8%               |
| My individual learning needs were accommodated in the SI sessions                  | Strongly Agree    | 33  | 30.8%               |
|                                                                                    | Agree             | 59  | 55.1%               |
|                                                                                    | Disagree          | 10  | 9.3%                |
|                                                                                    | Strongly Disagree | 5   | 4.7%                |
| Valid                                                                              |                   | 107 | 100.0%              |
| Missing                                                                            |                   | 15  |                     |
| Total                                                                              |                   | 122 |                     |

### Model Fitting Information

| Model          | -2 Log Likelihood | Chi-Square | df | Sig. |
|----------------|-------------------|------------|----|------|
| Intercept Only | 209.707           |            |    |      |
| Final          | 135.731           | 73.977     | 34 | .000 |

Link function: Logit.



### Goodness-of-Fit

|          | Chi-Square | df  | Sig.  |
|----------|------------|-----|-------|
| Pearson  | 320.071    | 284 | .069  |
| Deviance | 135.731    | 284 | 1.000 |

Link function: Logit.

### Pseudo R-Square

|               |      |
|---------------|------|
| Cox and Snell | .499 |
| Nagelkerke    | .581 |
| McFadden      | .353 |

Link function: Logit.

### Parameter Estimates

|           |           | Estimate       | Std. Error | Wald    | df | Sig. | 95% ...<br>Lower Bound |
|-----------|-----------|----------------|------------|---------|----|------|------------------------|
| Threshold | [C15 = 1] | -23.015        | 4.261      | 29.173  | 1  | .000 | -31.366                |
|           | [C15 = 2] | -17.797        | 4.207      | 17.901  | 1  | .000 | -26.042                |
|           | [C15 = 3] | -15.569        | 4.229      | 13.554  | 1  | .000 | -23.857                |
| Location  | A1        | .097           | .275       | .125    | 1  | .724 | -.441                  |
|           | A2        | -.585          | .254       | 5.293   | 1  | .021 | -1.084                 |
|           | A3        | -.540          | .557       | .941    | 1  | .332 | -1.632                 |
|           | [B4=1]    | -21.161        | 2.103      | 101.271 | 1  | .000 | -25.282                |
|           | [B4=2]    | -20.062        | 2.035      | 97.177  | 1  | .000 | -24.051                |
|           | [B4=3]    | -18.988        | .000       | .       | 1  | .    | -18.988                |
|           | [B4=4]    | 0 <sup>a</sup> | .          | .       | 0  | .    | .                      |
|           | [B5=1]    | 2.405          | 2.521      | .910    | 1  | .340 | -2.537                 |
|           | [B5=2]    | 3.572          | 2.509      | 2.026   | 1  | .155 | -1.346                 |
|           | [B5=3]    | 3.716          | 2.515      | 2.183   | 1  | .140 | -1.213                 |
|           | [B5=4]    | 0 <sup>a</sup> | .          | .       | 0  | .    | .                      |
|           | [B6=1]    | 4.144          | 1.918      | 4.671   | 1  | .031 | .386                   |
|           | [B6=2]    | 3.525          | 1.759      | 4.015   | 1  | .045 | .077                   |
|           | [B6=3]    | 4.609          | 4.695      | .964    | 1  | .326 | -4.594                 |
|           | [B6=4]    | 0 <sup>a</sup> | .          | .       | 0  | .    | .                      |
|           | [B7=1]    | -3.342         | 1.733      | 3.719   | 1  | .054 | -6.740                 |
|           | [B7=2]    | -2.536         | 1.636      | 2.403   | 1  | .121 | -5.742                 |
|           | [B7=3]    | -2.382         | 1.773      | 1.806   | 1  | .179 | -5.856                 |

## Parameter Estimates

|           |           | 95% Confidence |
|-----------|-----------|----------------|
|           |           | Upper Bound    |
| Threshold | [C15 = 1] | -14.663        |
|           | [C15 = 2] | -9.553         |
|           | [C15 = 3] | -7.280         |
| Location  | A1        | .635           |
|           | A2        | -.087          |
|           | A3        | .551           |
|           | [B4=1]    | -17.039        |
|           | [B4=2]    | -16.073        |
|           | [B4=3]    | -18.988        |
|           | [B4=4]    |                |
|           | [B5=1]    | 7.347          |
|           | [B5=2]    | 8.490          |
|           | [B5=3]    | 8.645          |
|           | [B5=4]    |                |
|           | [B6=1]    | 7.903          |
|           | [B6=2]    | 6.972          |
|           | [B6=3]    | 13.812         |
|           | [B6=4]    |                |
|           | [B7=1]    | .055           |
|           | [B7=2]    | .670           |
|           | [B7=3]    | 1.092          |

### Parameter Estimates

|         | Estimate       | Std. Error | Wald   | df | Sig. | 95% ...<br>Lower Bound |
|---------|----------------|------------|--------|----|------|------------------------|
| [B7=4]  | 0 <sup>a</sup> | .          | .      | 0  | .    | .                      |
| [B8=1]  | 2.575          | 1.581      | 2.653  | 1  | .103 | -.524                  |
| [B8=2]  | 1.513          | 1.600      | .894   | 1  | .344 | -1.624                 |
| [B8=3]  | 2.030          | 1.923      | 1.115  | 1  | .291 | -1.738                 |
| [B8=4]  | 0 <sup>a</sup> | .          | .      | 0  | .    | .                      |
| [B9=1]  | -3.718         | 3.585      | 1.075  | 1  | .300 | -10.744                |
| [B9=2]  | -2.566         | 3.582      | .513   | 1  | .474 | -9.588                 |
| [B9=3]  | -1.664         | 3.620      | .211   | 1  | .646 | -8.759                 |
| [B9=4]  | 0 <sup>a</sup> | .          | .      | 0  | .    | .                      |
| [B10=1] | 3.598          | 2.048      | 3.087  | 1  | .079 | -.415                  |
| [B10=2] | 3.291          | 1.977      | 2.770  | 1  | .096 | -.584                  |
| [B10=3] | 0 <sup>a</sup> | .          | .      | 0  | .    | .                      |
| [B11=1] | 1.268          | 1.293      | .962   | 1  | .327 | -1.266                 |
| [B11=2] | 1.863          | 1.338      | 1.938  | 1  | .164 | -.760                  |
| [B11=3] | 3.345          | 1.373      | 5.938  | 1  | .015 | .655                   |
| [B11=4] | 0 <sup>a</sup> | .          | .      | 0  | .    | .                      |
| [B12=1] | -.454          | 1.298      | .122   | 1  | .727 | -2.999                 |
| [B12=2] | -.840          | 1.214      | .478   | 1  | .489 | -3.220                 |
| [B12=3] | 0 <sup>a</sup> | .          | .      | 0  | .    | .                      |
| [B12=4] | 0 <sup>a</sup> | .          | .      | 0  | .    | .                      |
| [B13=1] | 1.675          | 1.096      | 2.335  | 1  | .126 | -.473                  |
| [B13=2] | .930           | .970       | .920   | 1  | .337 | -.970                  |
| [B13=3] | .837           | .968       | .747   | 1  | .387 | -1.061                 |
| [B13=4] | 0 <sup>a</sup> | .          | .      | 0  | .    | .                      |
| [B14=1] | -9.131         | 2.479      | 13.565 | 1  | .000 | -13.990                |
| [B14=2] | -6.640         | 2.266      | 8.587  | 1  | .003 | -11.082                |
| [B14=3] | -5.569         | 2.195      | 6.440  | 1  | .011 | -9.871                 |
| [B14=4] | 0 <sup>a</sup> | .          | .      | 0  | .    | .                      |

## Parameter Estimates

|         | 95% Confidence . |
|---------|------------------|
|         | Upper Bound      |
| [B7=4]  | .                |
| [B8=1]  | 5.673            |
| [B8=2]  | 4.650            |
| [B8=3]  | 5.798            |
| [B8=4]  | .                |
| [B9=1]  | 3.309            |
| [B9=2]  | 4.455            |
| [B9=3]  | 5.431            |
| [B9=4]  | .                |
| [B10=1] | 7.612            |
| [B10=2] | 7.166            |
| [B10=3] | .                |
| [B11=1] | 3.802            |
| [B11=2] | 4.486            |
| [B11=3] | 6.036            |
| [B11=4] | .                |
| [B12=1] | 2.091            |
| [B12=2] | 1.541            |
| [B12=3] | .                |
| [B12=4] | .                |
| [B13=1] | 3.823            |
| [B13=2] | 2.831            |
| [B13=3] | 2.735            |
| [B13=4] | .                |
| [B14=1] | -4.272           |
| [B14=2] | -2.199           |
| [B14=3] | -1.268           |
| [B14=4] | .                |

Link function: Logit.

a. This parameter is set to zero because it is redundant.

PLUMC16 BY B4 B5 B6 B7 B8 B9 B10 B11 B12 B13 B14 WITHA1 A2 A3

```

/CRITERIA=CIN(95) DELTA(0) LCONVERGE(0) MXITER(100) MXSTER(5) PCONVERGE(1.0E-6)
SINGULAR(1.0E-8)
/LINK=LOGIT
/PRINT=FIT PARAMETER SUMMARY.

```

## PLUM - Ordinal Regression

### Warnings

There are 321 (75.0%) cells (i.e., dependent variable levels by observed combinations of predictor variable values) with zero frequencies.

The log-likelihood value cannot be further increased after maximum number of step-halving.

The PLUM procedure continues despite the above warning(s). Subsequent results shown are based on the last iteration. Validity of the model fit is uncertain.

### Case Processing Summary

|                                                                                                                                       |                     | N  | Marginal Percentage |
|---------------------------------------------------------------------------------------------------------------------------------------|---------------------|----|---------------------|
| My marks for the various assessment tasks (assignments, tests and examinations) improved as a result of attendance to the SI sessions | To a great extent   | 48 | 44.9%               |
|                                                                                                                                       | Fairly well         | 42 | 39.3%               |
|                                                                                                                                       | To a limited extent | 10 | 9.3%                |
|                                                                                                                                       | Not at all          | 7  | 6.5%                |
| The SI leaders' facilitation methods enhanced understanding of concepts                                                               | Strongly Agree      | 40 | 37.4%               |
|                                                                                                                                       | Agree               | 63 | 58.9%               |
|                                                                                                                                       | Disagree            | 3  | 2.8%                |
|                                                                                                                                       | Strongly Disagree   | 1  | 0.9%                |
| The lecturer's attitude towards SI fostered my attendance of the SI sessions                                                          | Strongly Agree      | 27 | 25.2%               |
|                                                                                                                                       | Agree               | 51 | 47.7%               |
|                                                                                                                                       | Disagree            | 25 | 23.4%               |
|                                                                                                                                       | Strongly Disagree   | 4  | 3.7%                |
| The scheduling of the SI sessions ensured availability and accessibility of the students                                              | Strongly Agree      | 35 | 32.7%               |
|                                                                                                                                       | Agree               | 65 | 60.7%               |
|                                                                                                                                       | Disagree            | 1  | 0.9%                |
|                                                                                                                                       | Strongly Disagree   | 6  | 5.6%                |
| The monitoring of SI attendance by the lecturers encouraged my attendance to the SI sessions                                          | Strongly Agree      | 29 | 27.1%               |
|                                                                                                                                       | Agree               | 57 | 53.3%               |
|                                                                                                                                       | Disagree            | 16 | 15.0%               |
|                                                                                                                                       | Strongly Disagree   | 5  | 4.7%                |

### Case Processing Summary

|                                                                                    |                   | N   | Marginal Percentage |
|------------------------------------------------------------------------------------|-------------------|-----|---------------------|
| The student-SI leader relationship created an atmosphere conducive for learning    | Strongly Agree    | 35  | 32.7%               |
|                                                                                    | Agree             | 63  | 58.9%               |
|                                                                                    | Disagree          | 5   | 4.7%                |
|                                                                                    | Strongly Disagree | 4   | 3.7%                |
| The session venues allowed space for peer collaboration and transactional learning | Strongly Agree    | 41  | 38.3%               |
|                                                                                    | Agree             | 53  | 49.5%               |
|                                                                                    | Disagree          | 10  | 9.3%                |
|                                                                                    | Strongly Disagree | 3   | 2.8%                |
| The SI sessions were characterised by engagement, sharing and exchange of ideas    | Strongly Agree    | 46  | 43.0%               |
|                                                                                    | Agree             | 57  | 53.3%               |
|                                                                                    | Disagree          | 4   | 3.7%                |
| The SI leader followed me up and kept track of my progress and performance         | Strongly Agree    | 35  | 32.7%               |
|                                                                                    | Agree             | 35  | 32.7%               |
|                                                                                    | Disagree          | 29  | 27.1%               |
|                                                                                    | Strongly Disagree | 8   | 7.5%                |
| The SI sessions focused on the mastery of the subject outcomes                     | Strongly Agree    | 34  | 31.8%               |
|                                                                                    | Agree             | 66  | 61.7%               |
|                                                                                    | Disagree          | 6   | 5.6%                |
|                                                                                    | Strongly Disagree | 1   | 0.9%                |
| My classmates encouraged me to attend SI sessions                                  | Strongly Agree    | 17  | 15.9%               |
|                                                                                    | Agree             | 39  | 36.4%               |
|                                                                                    | Disagree          | 32  | 29.9%               |
|                                                                                    | Strongly Disagree | 19  | 17.8%               |
| My individual learning needs were accommodated in the SI sessions                  | Strongly Agree    | 33  | 30.8%               |
|                                                                                    | Agree             | 59  | 55.1%               |
|                                                                                    | Disagree          | 10  | 9.3%                |
|                                                                                    | Strongly Disagree | 5   | 4.7%                |
| Valid                                                                              |                   | 107 | 100.0%              |
| Missing                                                                            |                   | 15  |                     |
| Total                                                                              |                   | 122 |                     |

### Model Fitting Information

| Model          | -2 Log Likelihood | Chi-Square | df | Sig. |
|----------------|-------------------|------------|----|------|
| Intercept Only | 241.091           |            |    |      |
| Final          | 98.048            | 143.043    | 34 | .000 |

Link function: Logit.

### Goodness-of-Fit

|          | Chi-Square | df  | Sig.  |
|----------|------------|-----|-------|
| Pearson  | 237.718    | 284 | .979  |
| Deviance | 166.392    | 284 | 1.000 |

Link function: Logit.

### Pseudo R-Square

|               |      |
|---------------|------|
| Cox and Snell | .737 |
| Nagelkerke    | .824 |
| McFadden      | .593 |

Link function: Logit.

### Parameter Estimates

|           |           | Estimate       | Std. Error | Wald  | df | Sig.  | 95% ...<br>Lower Bound |
|-----------|-----------|----------------|------------|-------|----|-------|------------------------|
| Threshold | [C16 = 1] | -5.732         | 1726.692   | .000  | 1  | .997  | -3389.985              |
|           | [C16 = 2] | -2.716         | 1726.692   | .000  | 1  | .999  | -3386.970              |
|           | [C16 = 3] | -.878          | 1726.691   | .000  | 1  | 1.000 | -3385.132              |
| Location  | A1        | -.507          | .262       | 3.752 | 1  | .053  | -1.021                 |
|           | A2        | .134           | .223       | .359  | 1  | .549  | -.304                  |
|           | A3        | .640           | .530       | 1.456 | 1  | .228  | -.399                  |
|           | [B4=1]    | -38.832        | 2091.669   | .000  | 1  | .985  | -4138.427              |
|           | [B4=2]    | -38.709        | 2091.669   | .000  | 1  | .985  | -4138.305              |
|           | [B4=3]    | -37.563        | 2091.668   | .000  | 1  | .986  | -4137.157              |
|           | [B4=4]    | 0 <sup>a</sup> | .          | .     | 0  | .     | .                      |
|           | [B5=1]    | 17.968         | 621.372    | .001  | 1  | .977  | -1199.897              |
|           | [B5=2]    | 17.063         | 621.372    | .001  | 1  | .978  | -1200.803              |
|           | [B5=3]    | 16.484         | 621.371    | .001  | 1  | .979  | -1201.382              |
|           | [B5=4]    | 0 <sup>a</sup> | .          | .     | 0  | .     | .                      |
|           | [B6=1]    | 3.118          | 1.819      | 2.939 | 1  | .086  | -.447                  |
|           | [B6=2]    | 2.445          | 1.761      | 1.927 | 1  | .165  | -1.007                 |
|           | [B6=3]    | 1.751          | 2446.127   | .000  | 1  | .999  | -4792.569              |
|           | [B6=4]    | 0 <sup>a</sup> | .          | .     | 0  | .     | .                      |
|           | [B7=1]    | -3.688         | 1.754      | 4.422 | 1  | .035  | -7.126                 |
|           | [B7=2]    | -3.900         | 1.694      | 5.300 | 1  | .021  | -7.221                 |
|           | [B7=3]    | -1.317         | 1.665      | .625  | 1  | .429  | -4.579                 |
|           | [B7=4]    | 0 <sup>a</sup> | .          | .     | 0  | .     | .                      |
|           | [B8=1]    | 23.265         | 621.389    | .001  | 1  | .970  | -1194.635              |
|           | [B8=2]    | 23.522         | 621.388    | .001  | 1  | .970  | -1194.376              |
|           | [B8=3]    | 21.712         | 621.385    | .001  | 1  | .972  | -1196.181              |
|           | [B8=4]    | 0 <sup>a</sup> | .          | .     | 0  | .     | .                      |
|           | [B9=1]    | 17.004         | 1334.051   | .000  | 1  | .990  | -2597.688              |
|           | [B9=2]    | 17.358         | 1334.051   | .000  | 1  | .990  | -2597.335              |
|           | [B9=3]    | 17.501         | 1334.052   | .000  | 1  | .990  | -2597.192              |
|           | [B9=4]    | 0 <sup>a</sup> | .          | .     | 0  | .     | .                      |
|           | [B10=1]   | -2.781         | 1.906      | 2.128 | 1  | .145  | -6.518                 |
|           | [B10=2]   | -2.840         | 1.860      | 2.331 | 1  | .127  | -6.487                 |
|           | [B10=3]   | 0 <sup>a</sup> | .          | .     | 0  | .     | .                      |
|           | [B11=1]   | -.629          | 1.359      | .215  | 1  | .643  | -3.293                 |



## Parameter Estimates

|           |           | 95% Confidence |
|-----------|-----------|----------------|
|           |           | Upper Bound    |
| Threshold | [C16 = 1] | 3378.521       |
|           | [C16 = 2] | 3381.537       |
|           | [C16 = 3] | 3383.375       |
| Location  | A1        | .006           |
|           | A2        | .571           |
|           | A3        | 1.678          |
|           | [B4=1]    | 4060.763       |
|           | [B4=2]    | 4060.886       |
|           | [B4=3]    | 4062.030       |
|           | [B4=4]    | .              |
|           | [B5=1]    | 1235.834       |
|           | [B5=2]    | 1234.929       |
|           | [B5=3]    | 1234.349       |
|           | [B5=4]    | .              |
|           | [B6=1]    | 6.682          |
|           | [B6=2]    | 5.898          |
|           | [B6=3]    | 4796.071       |
|           | [B6=4]    | .              |
|           | [B7=1]    | -.251          |
|           | [B7=2]    | -.580          |
|           | [B7=3]    | 1.946          |
|           | [B7=4]    | .              |
|           | [B8=1]    | 1241.164       |
|           | [B8=2]    | 1241.420       |
|           | [B8=3]    | 1239.605       |
|           | [B8=4]    | .              |
|           | [B9=1]    | 2631.697       |
|           | [B9=2]    | 2632.050       |
|           | [B9=3]    | 2632.194       |
|           | [B9=4]    | .              |
|           | [B10=1]   | .955           |
|           | [B10=2]   | .806           |
|           | [B10=3]   | .              |
|           | [B11=1]   | 2.034          |

### Parameter Estimates

|         | Estimate       | Std. Error | Wald  | df | Sig. | 95% ...<br>Lower Bound |
|---------|----------------|------------|-------|----|------|------------------------|
| [B11=2] | .466           | 1.334      | .122  | 1  | .727 | -2.149                 |
| [B11=3] | .823           | 1.328      | .384  | 1  | .536 | -1.780                 |
| [B11=4] | 0 <sup>a</sup> | .          | .     | 0  | .    | .                      |
| [B12=1] | -.468          | 1.172      | .159  | 1  | .690 | -2.764                 |
| [B12=2] | -.451          | 1.092      | .170  | 1  | .680 | -2.591                 |
| [B12=3] | 0 <sup>a</sup> | .          | .     | 0  | .    | .                      |
| [B12=4] | 0 <sup>a</sup> | .          | .     | 0  | .    | .                      |
| [B13=1] | .201           | 1.043      | .037  | 1  | .847 | -1.844                 |
| [B13=2] | .332           | .925       | .129  | 1  | .720 | -1.481                 |
| [B13=3] | 1.644          | .920       | 3.191 | 1  | .074 | -.160                  |
| [B13=4] | 0 <sup>a</sup> | .          | .     | 0  | .    | .                      |
| [B14=1] | -21.822        | 621.377    | .001  | 1  | .972 | -1239.698              |
| [B14=2] | -21.954        | 621.376    | .001  | 1  | .972 | -1239.829              |
| [B14=3] | -21.435        | 621.375    | .001  | 1  | .972 | -1239.308              |
| [B14=4] | 0 <sup>a</sup> | .          | .     | 0  | .    | .                      |

### Parameter Estimates

|         | 95% Confidence<br>Upper Bound |
|---------|-------------------------------|
| [B11=2] | 3.080                         |
| [B11=3] | 3.427                         |
| [B11=4] | .                             |
| [B12=1] | 1.829                         |
| [B12=2] | 1.690                         |
| [B12=3] | .                             |
| [B12=4] | .                             |
| [B13=1] | 2.246                         |
| [B13=2] | 2.145                         |
| [B13=3] | 3.448                         |
| [B13=4] | .                             |
| [B14=1] | 1196.054                      |
| [B14=2] | 1195.922                      |
| [B14=3] | 1196.438                      |
| [B14=4] | .                             |

Link function: Logit.

- a. This parameter is set to zero because it is redundant.

```
PLUMC17 BY B4 B5 B6 B7 B8 B9 B10 B11 B12 B13 B14 WITHA1 A2 A3  
/CRITERIA=CIN(95) DELTA(0) LCONVERGE(0) MXITER(100) MXSTER(5) PCONVERGE(1.0E-6)  
SINGULAR(1.0E-8)  
/LINK=LOGIT  
/PRINT=FIT PARAMETERSUMMARY.
```

### **PLUM - Ordinal Regression**

#### **Warnings**

There are 321 (75.0%) cells (i.e., dependent variable levels by observed combinations of predictor variable values) with zero frequencies.

Unexpected singularities in the Fisher Information matrix are encountered. There may be a quasi-complete separation in the data. Some parameter estimates will tend to infinity.

The PLUM procedure continues despite the above warning(s). Subsequent results shown are based on the last iteration. Validity of the model fit is uncertain.

### Case Processing Summary

|                                                                                              |                     | N  | Marginal Percentage |
|----------------------------------------------------------------------------------------------|---------------------|----|---------------------|
| The sessions unlocked, exposed and unpacked difficult areas in the content subjects          | To a great extent   | 42 | 39.3%               |
|                                                                                              | Fairly well         | 50 | 46.7%               |
|                                                                                              | To a limited extent | 12 | 11.2%               |
|                                                                                              | Not at all          | 3  | 2.8%                |
| The SI leaders' facilitation methods enhanced understanding of concepts                      | Strongly Agree      | 40 | 37.4%               |
|                                                                                              | Agree               | 63 | 58.9%               |
|                                                                                              | Disagree            | 3  | 2.8%                |
|                                                                                              | Strongly Disagree   | 1  | 0.9%                |
| The lecturer's attitude towards SI fostered my attendance of the SI sessions                 | Strongly Agree      | 27 | 25.2%               |
|                                                                                              | Agree               | 51 | 47.7%               |
|                                                                                              | Disagree            | 25 | 23.4%               |
|                                                                                              | Strongly Disagree   | 4  | 3.7%                |
| The scheduling of the SI sessions ensured availability and accessibility of the students     | Strongly Agree      | 35 | 32.7%               |
|                                                                                              | Agree               | 65 | 60.7%               |
|                                                                                              | Disagree            | 1  | 0.9%                |
|                                                                                              | Strongly Disagree   | 6  | 5.6%                |
| The monitoring of SI attendance by the lecturers encouraged my attendance to the SI sessions | Strongly Agree      | 29 | 27.1%               |
|                                                                                              | Agree               | 57 | 53.3%               |
|                                                                                              | Disagree            | 16 | 15.0%               |
|                                                                                              | Strongly Disagree   | 5  | 4.7%                |
| The student-SI leader relationship created an atmosphere conducive for learning              | Strongly Agree      | 35 | 32.7%               |
|                                                                                              | Agree               | 63 | 58.9%               |
|                                                                                              | Disagree            | 5  | 4.7%                |
|                                                                                              | Strongly Disagree   | 4  | 3.7%                |
| The session venues allowed space for peer collaboration and transactional learning           | Strongly Agree      | 41 | 38.3%               |
|                                                                                              | Agree               | 53 | 49.5%               |
|                                                                                              | Disagree            | 10 | 9.3%                |
|                                                                                              | Strongly Disagree   | 3  | 2.8%                |
| The SI sessions were characterised by engagement, sharing and exchange of ideas              | Strongly Agree      | 46 | 43.0%               |
|                                                                                              | Agree               | 57 | 53.3%               |
|                                                                                              | Disagree            | 4  | 3.7%                |
| The SI leader followed me up and kept track of my progress and performance                   | Strongly Agree      | 35 | 32.7%               |
|                                                                                              | Agree               | 35 | 32.7%               |
|                                                                                              | Disagree            | 29 | 27.1%               |
|                                                                                              | Strongly Disagree   | 8  | 7.5%                |

### Case Processing Summary

|                                                                  |                   | N   | Marginal Percentage |
|------------------------------------------------------------------|-------------------|-----|---------------------|
| The SI sessions focused on the mastery of the subject outcomes   | Strongly Agree    | 34  | 31.8%               |
|                                                                  | Agree             | 66  | 61.7%               |
|                                                                  | Disagree          | 6   | 5.6%                |
|                                                                  | Strongly Disagree | 1   | 0.9%                |
| My classmates encouraged me to attend SI sessions                | Strongly Agree    | 17  | 15.9%               |
|                                                                  | Agree             | 39  | 36.4%               |
|                                                                  | Disagree          | 32  | 29.9%               |
|                                                                  | Strongly Disagree | 19  | 17.8%               |
| My individual learning needs were accomodated in the SI sessions | Strongly Agree    | 33  | 30.8%               |
|                                                                  | Agree             | 59  | 55.1%               |
|                                                                  | Disagree          | 10  | 9.3%                |
|                                                                  | Strongly Disagree | 5   | 4.7%                |
| Valid                                                            |                   | 107 | 100.0%              |
| Missing                                                          |                   | 15  |                     |
| Total                                                            |                   | 122 |                     |

### Model Fitting Information

| Model          | -2 Log Likelihood | Chi-Square | df | Sig. |
|----------------|-------------------|------------|----|------|
| Intercept Only | 228.589           |            |    |      |
| Final          | 148.332           | 80.257     | 34 | .000 |

Link function: Logit.

### Goodness-of-Fit

|          | Chi-Square | df  | Sig.  |
|----------|------------|-----|-------|
| Pearson  | 178.323    | 284 | 1.000 |
| Deviance | 148.332    | 284 | 1.000 |

Link function: Logit.

### Pseudo R-Square

|               |      |
|---------------|------|
| Cox and Snell | .528 |
| Nagelkerke    | .598 |
| McFadden      | .351 |

Link function: Logit.

### Parameter Estimates

|           |           | Estimate       | Std. Error | Wald  | df | Sig. | 95% ...<br>Lower Bound |
|-----------|-----------|----------------|------------|-------|----|------|------------------------|
| Threshold | [C17 = 1] | -5.042         | 4.081      | 1.527 | 1  | .217 | -13.039                |
|           | [C17 = 2] | -.964          | 4.041      | .057  | 1  | .811 | -8.885                 |
|           | [C17 = 3] | 2.547          | 4.212      | .366  | 1  | .545 | -5.708                 |
| Location  | A1        | -.503          | .259       | 3.768 | 1  | .052 | -1.012                 |
|           | A2        | -.087          | .236       | .135  | 1  | .714 | -.550                  |
|           | A3        | -.635          | .575       | 1.220 | 1  | .269 | -1.761                 |
|           | [B4=1]    | 10.057         | 4.836      | 4.324 | 1  | .038 | .578                   |
|           | [B4=2]    | 11.039         | 4.761      | 5.376 | 1  | .020 | 1.707                  |
|           | [B4=3]    | 11.442         | 5.033      | 5.168 | 1  | .023 | 1.577                  |
|           | [B4=4]    | 0 <sup>a</sup> | .          | .     | 0  | .    | .                      |
|           | [B5=1]    | 6.226          | 2.213      | 7.911 | 1  | .005 | 1.887                  |
|           | [B5=2]    | 5.378          | 2.186      | 6.049 | 1  | .014 | 1.092                  |
|           | [B5=3]    | 3.283          | 2.096      | 2.453 | 1  | .117 | -.825                  |
|           | [B5=4]    | 0 <sup>a</sup> | .          | .     | 0  | .    | .                      |
|           | [B6=1]    | 2.321          | 1.595      | 2.116 | 1  | .146 | -.806                  |
|           | [B6=2]    | 1.452          | 1.428      | 1.034 | 1  | .309 | -1.347                 |
|           | [B6=3]    | -14.539        | .000       | .     | 1  | .    | -14.539                |
|           | [B6=4]    | 0 <sup>a</sup> | .          | .     | 0  | .    | .                      |
|           | [B7=1]    | -3.639         | 1.697      | 4.599 | 1  | .032 | -6.964                 |
|           | [B7=2]    | -3.126         | 1.572      | 3.957 | 1  | .047 | -6.206                 |
|           | [B7=3]    | -2.172         | 1.678      | 1.676 | 1  | .195 | -5.460                 |
|           | [B7=4]    | 0 <sup>a</sup> | .          | .     | 0  | .    | .                      |
|           | [B8=1]    | -3.248         | 1.603      | 4.106 | 1  | .043 | -6.389                 |
|           | [B8=2]    | -3.057         | 1.594      | 3.677 | 1  | .055 | -6.181                 |
|           | [B8=3]    | -5.094         | 2.127      | 5.734 | 1  | .017 | -9.264                 |
|           | [B8=4]    | 0 <sup>a</sup> | .          | .     | 0  | .    | .                      |
|           | [B9=1]    | -5.052         | 2.367      | 4.554 | 1  | .033 | -9.692                 |
|           | [B9=2]    | -4.896         | 2.335      | 4.397 | 1  | .036 | -9.472                 |
|           | [B9=3]    | -4.434         | 2.428      | 3.336 | 1  | .068 | -9.192                 |
|           | [B9=4]    | 0 <sup>a</sup> | .          | .     | 0  | .    | .                      |
|           | [B10=1]   | .911           | 1.777      | .263  | 1  | .608 | -2.573                 |
|           | [B10=2]   | 2.007          | 1.770      | 1.287 | 1  | .257 | -1.461                 |

## Parameter Estimates

95% Confidence

Upper Bound

|           |           |         |
|-----------|-----------|---------|
| Threshold | [C17 = 1] | 2.956   |
|           | [C17 = 2] | 6.956   |
|           | [C17 = 3] | 10.803  |
| Location  | A1        | .005    |
|           | A2        | .377    |
|           | A3        | .492    |
|           | [B4=1]    | 19.535  |
|           | [B4=2]    | 20.371  |
|           | [B4=3]    | 21.307  |
|           | [B4=4]    | .       |
|           | [B5=1]    | 10.564  |
|           | [B5=2]    | 9.663   |
|           | [B5=3]    | 7.392   |
|           | [B5=4]    | .       |
|           | [B6=1]    | 5.448   |
|           | [B6=2]    | 4.250   |
|           | [B6=3]    | -14.539 |
|           | [B6=4]    | .       |
|           | [B7=1]    | -.313   |
|           | [B7=2]    | -.046   |
|           | [B7=3]    | 1.116   |
|           | [B7=4]    | .       |
|           | [B8=1]    | -.106   |
|           | [B8=2]    | .068    |
|           | [B8=3]    | -.924   |
|           | [B8=4]    | .       |
|           | [B9=1]    | -.412   |
|           | [B9=2]    | -.320   |
|           | [B9=3]    | .324    |
|           | [B9=4]    | .       |
|           | [B10=1]   | 4.394   |
|           | [B10=2]   | 5.476   |

### Parameter Estimates

|         | Estimate       | Std. Error | Wald   | df | Sig. | 95% ...<br>Lower Bound |
|---------|----------------|------------|--------|----|------|------------------------|
| [B10=3] | 0 <sup>a</sup> | .          | .      | 0  | .    | .                      |
| [B11=1] | .608           | 1.289      | .223   | 1  | .637 | -1.918                 |
| [B11=2] | .716           | 1.292      | .307   | 1  | .579 | -1.815                 |
| [B11=3] | .931           | 1.229      | .574   | 1  | .449 | -1.477                 |
| [B11=4] | 0 <sup>a</sup> | .          | .      | 0  | .    | .                      |
| [B12=1] | -4.173         | 1.356      | 9.475  | 1  | .002 | -6.831                 |
| [B12=2] | -2.944         | 1.231      | 5.720  | 1  | .017 | -5.356                 |
| [B12=3] | 0 <sup>a</sup> | .          | .      | 0  | .    | .                      |
| [B12=4] | 0 <sup>a</sup> | .          | .      | 0  | .    | .                      |
| [B13=1] | -.356          | 1.021      | .122   | 1  | .727 | -2.358                 |
| [B13=2] | -.079          | .895       | .008   | 1  | .930 | -1.834                 |
| [B13=3] | 1.452          | .921       | 2.487  | 1  | .115 | -.353                  |
| [B13=4] | 0 <sup>a</sup> | .          | .      | 0  | .    | .                      |
| [B14=1] | -7.576         | 2.312      | 10.734 | 1  | .001 | -12.107                |
| [B14=2] | -7.783         | 2.227      | 12.210 | 1  | .000 | -12.148                |
| [B14=3] | -5.137         | 2.024      | 6.438  | 1  | .011 | -9.104                 |
| [B14=4] | 0 <sup>a</sup> | .          | .      | 0  | .    | .                      |



## Parameter Estimates

|         | 95% Confidence |
|---------|----------------|
|         | Upper Bound    |
| [B10=3] | .              |
| [B11=1] | 3.134          |
| [B11=2] | 3.248          |
| [B11=3] | 3.340          |
| [B11=4] | .              |
| [B12=1] | -1.516         |
| [B12=2] | -.531          |
| [B12=3] | .              |
| [B12=4] | .              |
| [B13=1] | 1.645          |
| [B13=2] | 1.676          |
| [B13=3] | 3.258          |
| [B13=4] | .              |
| [B14=1] | -3.044         |
| [B14=2] | -3.417         |
| [B14=3] | -1.169         |
| [B14=4] | .              |

Link function: Logit.

a. This parameter is set to zero because it is redundant.

PLUM C17 BY B4 B5 B6 B7 B8 B9 B10 B11 B12 B13 B14 WITH A1 A2 A3

/CRITERIA=CIN(95) DELTA(0) LCONVERGE(0) MXITER(100) MXSTEP(5) PCONVERGE(1.0E-6) SINGULAR(1.0E-8)

/LINK=LOGIT

/PRINT=FIT PARAMETER SUMMARY.

## PLUM - Ordinal Regression

## Warnings

There are 321 (75.0%) cells (i.e., dependent variable levels by observed combinations of predictor variable values) with zero frequencies.

Unexpected singularities in the Fisher Information matrix are encountered. There may be a quasi-complete separation in the data. Some parameter estimates will tend to infinity.

The PLUM procedure continues despite the above warning(s). Subsequent results shown are based on the last iteration. Validity of the model fit is uncertain.

## Case Processing Summary

|                                                                                              |                     | N  | Marginal Percentage |
|----------------------------------------------------------------------------------------------|---------------------|----|---------------------|
| The sessions unlocked, exposed and unpacked difficult areas in the content subjects          | To a great extent   | 42 | 39.3%               |
|                                                                                              | Fairly well         | 50 | 46.7%               |
|                                                                                              | To a limited extent | 12 | 11.2%               |
|                                                                                              | Not at all          | 3  | 2.8%                |
| The SI leaders' facilitation methods enhanced understanding of concepts                      | Strongly Agree      | 40 | 37.4%               |
|                                                                                              | Agree               | 63 | 58.9%               |
|                                                                                              | Disagree            | 3  | 2.8%                |
|                                                                                              | Strongly Disagree   | 1  | 0.9%                |
| The lecturer's attitude towards SI fostered my attendance of the SI sessions                 | Strongly Agree      | 27 | 25.2%               |
|                                                                                              | Agree               | 51 | 47.7%               |
|                                                                                              | Disagree            | 25 | 23.4%               |
|                                                                                              | Strongly Disagree   | 4  | 3.7%                |
| The scheduling of the SI sessions ensured availability and accessibility of the students     | Strongly Agree      | 35 | 32.7%               |
|                                                                                              | Agree               | 65 | 60.7%               |
|                                                                                              | Disagree            | 1  | 0.9%                |
|                                                                                              | Strongly Disagree   | 6  | 5.6%                |
| The monitoring of SI attendance by the lecturers encouraged my attendance to the SI sessions | Strongly Agree      | 29 | 27.1%               |
|                                                                                              | Agree               | 57 | 53.3%               |
|                                                                                              | Disagree            | 16 | 15.0%               |
|                                                                                              | Strongly Disagree   | 5  | 4.7%                |
| The student-SI leader relationship created an atmosphere conducive for learning              | Strongly Agree      | 35 | 32.7%               |
|                                                                                              | Agree               | 63 | 58.9%               |
|                                                                                              | Disagree            | 5  | 4.7%                |
|                                                                                              | Strongly Disagree   | 4  | 3.7%                |

### Case Processing Summary

|                                                                                    |                   | N   | Marginal Percentage |
|------------------------------------------------------------------------------------|-------------------|-----|---------------------|
| The session venues allowed space for peer collaboration and transactional learning | Strongly Agree    | 41  | 38.3%               |
|                                                                                    | Agree             | 53  | 49.5%               |
|                                                                                    | Disagree          | 10  | 9.3%                |
|                                                                                    | Strongly Disagree | 3   | 2.8%                |
| The SI sessions were characterised by engagement, sharing and exchange of ideas    | Strongly Agree    | 46  | 43.0%               |
|                                                                                    | Agree             | 57  | 53.3%               |
|                                                                                    | Disagree          | 4   | 3.7%                |
| The SI leader followed me up and kept track of my progress and performance         | Strongly Agree    | 35  | 32.7%               |
|                                                                                    | Agree             | 35  | 32.7%               |
|                                                                                    | Disagree          | 29  | 27.1%               |
|                                                                                    | Strongly Disagree | 8   | 7.5%                |
| The SI sessions focused on the mastery of the subject outcomes                     | Strongly Agree    | 34  | 31.8%               |
|                                                                                    | Agree             | 66  | 61.7%               |
|                                                                                    | Disagree          | 6   | 5.6%                |
|                                                                                    | Strongly Disagree | 1   | 0.9%                |
| My classmates encouraged me to attend SI sessions                                  | Strongly Agree    | 17  | 15.9%               |
|                                                                                    | Agree             | 39  | 36.4%               |
|                                                                                    | Disagree          | 32  | 29.9%               |
|                                                                                    | Strongly Disagree | 19  | 17.8%               |
| My individual learning needs were accommodated in the SI sessions                  | Strongly Agree    | 33  | 30.8%               |
|                                                                                    | Agree             | 59  | 55.1%               |
|                                                                                    | Disagree          | 10  | 9.3%                |
|                                                                                    | Strongly Disagree | 5   | 4.7%                |
| Valid                                                                              |                   | 107 | 100.0%              |
| Missing                                                                            |                   | 15  |                     |
| Total                                                                              |                   | 122 |                     |

### Model Fitting Information

| Model          | -2 Log Likelihood | Chi-Square | df | Sig. |
|----------------|-------------------|------------|----|------|
| Intercept Only | 228.589           |            |    |      |
| Final          | 148.332           | 80.257     | 34 | .000 |

Link function: Logit.

### Goodness-of-Fit

|          | Chi-Square | df  | Sig.  |
|----------|------------|-----|-------|
| Pearson  | 178.323    | 284 | 1.000 |
| Deviance | 148.332    | 284 | 1.000 |

Link function: Logit.

### Pseudo R-Square

|               |      |
|---------------|------|
| Cox and Snell | .528 |
| Nagelkerke    | .598 |
| McFadden      | .351 |

Link function: Logit.

### Parameter Estimates

|           |           | Estimate       | Std. Error | Wald  | df | Sig. | 95% ...<br>Lower Bound |
|-----------|-----------|----------------|------------|-------|----|------|------------------------|
| Threshold | [C17 = 1] | -5.042         | 4.081      | 1.527 | 1  | .217 | -13.039                |
|           | [C17 = 2] | -.964          | 4.041      | .057  | 1  | .811 | -8.885                 |
|           | [C17 = 3] | 2.547          | 4.212      | .366  | 1  | .545 | -5.708                 |
| Location  | A1        | -.503          | .259       | 3.768 | 1  | .052 | -1.012                 |
|           | A2        | -.087          | .236       | .135  | 1  | .714 | -.550                  |
|           | A3        | -.635          | .575       | 1.220 | 1  | .269 | -1.761                 |
|           | [B4=1]    | 10.057         | 4.836      | 4.324 | 1  | .038 | .578                   |
|           | [B4=2]    | 11.039         | 4.761      | 5.376 | 1  | .020 | 1.707                  |
|           | [B4=3]    | 11.442         | 5.033      | 5.168 | 1  | .023 | 1.577                  |
|           | [B4=4]    | 0 <sup>a</sup> | .          | .     | 0  | .    | .                      |
|           | [B5=1]    | 6.226          | 2.213      | 7.911 | 1  | .005 | 1.887                  |
|           | [B5=2]    | 5.378          | 2.186      | 6.049 | 1  | .014 | 1.092                  |
|           | [B5=3]    | 3.283          | 2.096      | 2.453 | 1  | .117 | -.825                  |
|           | [B5=4]    | 0 <sup>a</sup> | .          | .     | 0  | .    | .                      |
|           | [B6=1]    | 2.321          | 1.595      | 2.116 | 1  | .146 | -.806                  |
|           | [B6=2]    | 1.452          | 1.428      | 1.034 | 1  | .309 | -1.347                 |
|           | [B6=3]    | -14.539        | .000       | .     | 1  | .    | -14.539                |
|           | [B6=4]    | 0 <sup>a</sup> | .          | .     | 0  | .    | .                      |
|           | [B7=1]    | -3.639         | 1.697      | 4.599 | 1  | .032 | -6.964                 |
|           | [B7=2]    | -3.126         | 1.572      | 3.957 | 1  | .047 | -6.206                 |
|           | [B7=3]    | -2.172         | 1.678      | 1.676 | 1  | .195 | -5.460                 |

## Parameter Estimates

|           |           | 95% Confidence |
|-----------|-----------|----------------|
|           |           | Upper Bound    |
| Threshold | [C17 = 1] | 2.956          |
|           | [C17 = 2] | 6.956          |
|           | [C17 = 3] | 10.803         |
| Location  | A1        | .005           |
|           | A2        | .377           |
|           | A3        | .492           |
|           | [B4=1]    | 19.535         |
|           | [B4=2]    | 20.371         |
|           | [B4=3]    | 21.307         |
|           | [B4=4]    | .              |
|           | [B5=1]    | 10.564         |
|           | [B5=2]    | 9.663          |
|           | [B5=3]    | 7.392          |
|           | [B5=4]    | .              |
|           | [B6=1]    | 5.448          |
|           | [B6=2]    | 4.250          |
|           | [B6=3]    | -14.539        |
|           | [B6=4]    | .              |
|           | [B7=1]    | -.313          |
|           | [B7=2]    | -.046          |
|           | [B7=3]    | 1.116          |

### Parameter Estimates

|         | Estimate       | Std. Error | Wald   | df | Sig. | 95% ...<br>Lower Bound |
|---------|----------------|------------|--------|----|------|------------------------|
| [B7=4]  | 0 <sup>a</sup> | .          | .      | 0  | .    | .                      |
| [B8=1]  | -3.248         | 1.603      | 4.106  | 1  | .043 | -6.389                 |
| [B8=2]  | -3.057         | 1.594      | 3.677  | 1  | .055 | -6.181                 |
| [B8=3]  | -5.094         | 2.127      | 5.734  | 1  | .017 | -9.264                 |
| [B8=4]  | 0 <sup>a</sup> | .          | .      | 0  | .    | .                      |
| [B9=1]  | -5.052         | 2.367      | 4.554  | 1  | .033 | -9.692                 |
| [B9=2]  | -4.896         | 2.335      | 4.397  | 1  | .036 | -9.472                 |
| [B9=3]  | -4.434         | 2.428      | 3.336  | 1  | .068 | -9.192                 |
| [B9=4]  | 0 <sup>a</sup> | .          | .      | 0  | .    | .                      |
| [B10=1] | .911           | 1.777      | .263   | 1  | .608 | -2.573                 |
| [B10=2] | 2.007          | 1.770      | 1.287  | 1  | .257 | -1.461                 |
| [B10=3] | 0 <sup>a</sup> | .          | .      | 0  | .    | .                      |
| [B11=1] | .608           | 1.289      | .223   | 1  | .637 | -1.918                 |
| [B11=2] | .716           | 1.292      | .307   | 1  | .579 | -1.815                 |
| [B11=3] | .931           | 1.229      | .574   | 1  | .449 | -1.477                 |
| [B11=4] | 0 <sup>a</sup> | .          | .      | 0  | .    | .                      |
| [B12=1] | -4.173         | 1.356      | 9.475  | 1  | .002 | -6.831                 |
| [B12=2] | -2.944         | 1.231      | 5.720  | 1  | .017 | -5.356                 |
| [B12=3] | 0 <sup>a</sup> | .          | .      | 0  | .    | .                      |
| [B12=4] | 0 <sup>a</sup> | .          | .      | 0  | .    | .                      |
| [B13=1] | -.356          | 1.021      | .122   | 1  | .727 | -2.358                 |
| [B13=2] | -.079          | .895       | .008   | 1  | .930 | -1.834                 |
| [B13=3] | 1.452          | .921       | 2.487  | 1  | .115 | -.353                  |
| [B13=4] | 0 <sup>a</sup> | .          | .      | 0  | .    | .                      |
| [B14=1] | -7.576         | 2.312      | 10.734 | 1  | .001 | -12.107                |
| [B14=2] | -7.783         | 2.227      | 12.210 | 1  | .000 | -12.148                |
| [B14=3] | -5.137         | 2.024      | 6.438  | 1  | .011 | -9.104                 |
| [B14=4] | 0 <sup>a</sup> | .          | .      | 0  | .    | .                      |

## Parameter Estimates

95% Confidence

Upper Bound

|         |        |
|---------|--------|
| [B7=4]  | .      |
| [B8=1]  | -.106  |
| [B8=2]  | .068   |
| [B8=3]  | -.924  |
| [B8=4]  | .      |
| [B9=1]  | -.412  |
| [B9=2]  | -.320  |
| [B9=3]  | .324   |
| [B9=4]  | .      |
| [B10=1] | 4.394  |
| [B10=2] | 5.476  |
| [B10=3] | .      |
| [B11=1] | 3.134  |
| [B11=2] | 3.248  |
| [B11=3] | 3.340  |
| [B11=4] | .      |
| [B12=1] | -1.516 |
| [B12=2] | -.531  |
| [B12=3] | .      |
| [B12=4] | .      |
| [B13=1] | 1.645  |
| [B13=2] | 1.676  |
| [B13=3] | 3.258  |
| [B13=4] | .      |
| [B14=1] | -3.044 |
| [B14=2] | -3.417 |
| [B14=3] | -1.169 |
| [B14=4] | .      |

Link function: Logit.

a. This parameter is set to zero because it is redundant.

PLUM C19 BY B4 B5 B6 B7 B8 B9 B10 B11 B12 B13 B14 WITH A1 A2 A3

/CRITERIA=CIN(95) DELTA(0) LCONVERGE(0) MXITER(100) MXSTER(5) PCONVERGE(1.0E-6)  
SINGULAR(1.0E-8)

/LINK=LOGIT

/PRINT=FIT PARAMETERSUMMARY.

## PLUM - Ordinal Regression

### Warnings

There are 303 (75.0%) cells (i.e., dependent variable levels by observed combinations of predictor variable values) with zero frequencies.

Unexpected singularities in the Fisher Information matrix are encountered. There may be a quasi-complete separation in the data. Some parameter estimates will tend to infinity.

The PLUM procedure continues despite the above warning(s).  
Subsequent results shown are based on the last iteration.  
Validity of the model fit is uncertain.

### Case Processing Summary

|                                                                                              |                     | N  | Marginal Percentage |
|----------------------------------------------------------------------------------------------|---------------------|----|---------------------|
| SI attendance enabled assimilation into the culture and ethos of the university              | To a great extent   | 22 | 21.8%               |
|                                                                                              | Fairly well         | 43 | 42.6%               |
|                                                                                              | To a limited extent | 29 | 28.7%               |
|                                                                                              | Not at all          | 7  | 6.9%                |
| The SI leaders' facilitation methods enhanced understanding of concepts                      | Strongly Agree      | 38 | 37.6%               |
|                                                                                              | Agree               | 59 | 58.4%               |
|                                                                                              | Disagree            | 3  | 3.0%                |
|                                                                                              | Strongly Disagree   | 1  | 1.0%                |
| The lecturer's attitude towards SI fostered my attendance of the SI sessions                 | Strongly Agree      | 26 | 25.7%               |
|                                                                                              | Agree               | 51 | 50.5%               |
|                                                                                              | Disagree            | 20 | 19.8%               |
|                                                                                              | Strongly Disagree   | 4  | 4.0%                |
| The scheduling of the SI sessions ensured availability and accessibility of the students     | Strongly Agree      | 33 | 32.7%               |
|                                                                                              | Agree               | 61 | 60.4%               |
|                                                                                              | Disagree            | 1  | 1.0%                |
|                                                                                              | Strongly Disagree   | 6  | 5.9%                |
| The monitoring of SI attendance by the lecturers encouraged my attendance to the SI sessions | Strongly Agree      | 28 | 27.7%               |
|                                                                                              | Agree               | 55 | 54.5%               |
|                                                                                              | Disagree            | 13 | 12.9%               |
|                                                                                              | Strongly Disagree   | 5  | 5.0%                |



### Case Processing Summary

|                                                                                    |                   | N   | Marginal Percentage |
|------------------------------------------------------------------------------------|-------------------|-----|---------------------|
| The student-SI leader relation ship created an atmosphere conducive for learning   | Strongly Agree    | 33  | 32.7%               |
|                                                                                    | Agree             | 60  | 59.4%               |
|                                                                                    | Disagree          | 5   | 5.0%                |
|                                                                                    | Strongly Disagree | 3   | 3.0%                |
| The session venues allowed space for peer collaboration and transactional learning | Strongly Agree    | 39  | 38.6%               |
|                                                                                    | Agree             | 50  | 49.5%               |
|                                                                                    | Disagree          | 9   | 8.9%                |
|                                                                                    | Strongly Disagree | 3   | 3.0%                |
| The SI sessions were characterised by engagement, sharing and exchange of ideas    | Strongly Agree    | 43  | 42.6%               |
|                                                                                    | Agree             | 54  | 53.5%               |
|                                                                                    | Disagree          | 4   | 4.0%                |
| The SI leader followed me up and kept track of my progress and performance         | Strongly Agree    | 34  | 33.7%               |
|                                                                                    | Agree             | 35  | 34.7%               |
|                                                                                    | Disagree          | 25  | 24.8%               |
|                                                                                    | Strongly Disagree | 7   | 6.9%                |
| The SI sessions focused on the mastery of the subject outcomes                     | Strongly Agree    | 31  | 30.7%               |
|                                                                                    | Agree             | 64  | 63.4%               |
|                                                                                    | Disagree          | 5   | 5.0%                |
|                                                                                    | Strongly Disagree | 1   | 1.0%                |
| My classmates encouraged me to attend SI sessions                                  | Strongly Agree    | 17  | 16.8%               |
|                                                                                    | Agree             | 36  | 35.6%               |
|                                                                                    | Disagree          | 30  | 29.7%               |
|                                                                                    | Strongly Disagree | 18  | 17.8%               |
| My individual learning needs were accomodated in the SI sessions                   | Strongly Agree    | 31  | 30.7%               |
|                                                                                    | Agree             | 56  | 55.4%               |
|                                                                                    | Disagree          | 9   | 8.9%                |
|                                                                                    | Strongly Disagree | 5   | 5.0%                |
| Valid                                                                              |                   | 101 | 100.0%              |
| Missing                                                                            |                   | 21  |                     |
| Total                                                                              |                   | 122 |                     |

### Model Fitting Information

| Model          | -2 Log Likelihood | Chi-Square | df | Sig. |
|----------------|-------------------|------------|----|------|
| Intercept Only | 250.239           |            |    |      |
| Final          | 192.636           | 57.603     | 34 | .007 |

Link function: Logit.

### Goodness-of-Fit

|          | Chi-Square | df  | Sig.  |
|----------|------------|-----|-------|
| Pearson  | 251.684    | 266 | .727  |
| Deviance | 192.636    | 266 | 1.000 |

Link function: Logit.

### Pseudo R-Square

|               |      |
|---------------|------|
| Cox and Snell | .435 |
| Nagelkerke    | .474 |
| McFadden      | .230 |

Link function: Logit.

### Parameter Estimates

|           |           | Estimate       | Std. Error | Wald    | df | Sig. | 95% ...<br>Lower Bound |
|-----------|-----------|----------------|------------|---------|----|------|------------------------|
| Threshold | [C19 = 1] | 19.078         | 3.440      | 30.758  | 1  | .000 | 12.336                 |
|           | [C19 = 2] | 21.787         | 3.397      | 41.141  | 1  | .000 | 15.130                 |
|           | [C19 = 3] | 24.784         | 3.294      | 56.628  | 1  | .000 | 18.329                 |
| Location  | A1        | -.110          | .241       | .207    | 1  | .649 | -.582                  |
|           | A2        | -.039          | .207       | .035    | 1  | .852 | -.445                  |
|           | A3        | -.742          | .511       | 2.110   | 1  | .146 | -1.743                 |
|           | [B4=1]    | 25.964         | 1.606      | 261.333 | 1  | .000 | 22.816                 |
|           | [B4=2]    | 27.109         | 1.539      | 310.382 | 1  | .000 | 24.093                 |
|           | [B4=3]    | 27.998         | .000       | .       | 1  | .    | 27.998                 |
|           | [B4=4]    | 0 <sup>a</sup> | .          | .       | 0  | .    | .                      |
|           | [B5=1]    | 2.760          | 1.962      | 1.979   | 1  | .160 | -1.085                 |
|           | [B5=2]    | 3.233          | 1.968      | 2.700   | 1  | .100 | -.623                  |
|           | [B5=3]    | 3.210          | 1.965      | 2.670   | 1  | .102 | -.641                  |
|           | [B5=4]    | 0 <sup>a</sup> | .          | .       | 0  | .    | .                      |
|           | [B6=1]    | -.301          | 1.482      | .041    | 1  | .839 | -3.206                 |
|           | [B6=2]    | .103           | 1.312      | .006    | 1  | .937 | -2.469                 |
|           | [B6=3]    | 2.650          | 3.518      | .567    | 1  | .451 | -4.245                 |
|           | [B6=4]    | 0 <sup>a</sup> | .          | .       | 0  | .    | .                      |
|           | [B7=1]    | -2.364         | 1.527      | 2.398   | 1  | .122 | -5.356                 |
|           | [B7=2]    | -3.619         | 1.463      | 6.120   | 1  | .013 | -6.487                 |
|           | [B7=3]    | -2.577         | 1.680      | 2.352   | 1  | .125 | -5.869                 |
|           | [B7=4]    | 0 <sup>a</sup> | .          | .       | 0  | .    | .                      |
|           | [B8=1]    | .867           | 1.894      | .209    | 1  | .647 | -2.846                 |
|           | [B8=2]    | 1.142          | 1.877      | .370    | 1  | .543 | -2.537                 |
|           | [B8=3]    | .055           | 1.980      | .001    | 1  | .978 | -3.825                 |
|           | [B8=4]    | 0 <sup>a</sup> | .          | .       | 0  | .    | .                      |
|           | [B9=1]    | -1.372         | 2.270      | .365    | 1  | .546 | -5.822                 |
|           | [B9=2]    | -1.377         | 2.233      | .380    | 1  | .537 | -5.754                 |
|           | [B9=3]    | -.384          | 2.355      | .027    | 1  | .871 | -5.000                 |
|           | [B9=4]    | 0 <sup>a</sup> | .          | .       | 0  | .    | .                      |
|           | [B10=1]   | -.063          | 1.576      | .002    | 1  | .968 | -3.152                 |
|           | [B10=2]   | -1.123         | 1.540      | .531    | 1  | .466 | -4.142                 |
|           | [B10=3]   | 0 <sup>a</sup> | .          | .       | 0  | .    | .                      |
|           | [B11=1]   | 1.961          | 1.240      | 2.503   | 1  | .114 | -.469                  |

## Parameter Estimates

|           |           | 95% Confidence<br>Upper Bound |
|-----------|-----------|-------------------------------|
| Threshold | [C19 = 1] | 25.820                        |
|           | [C19 = 2] | 28.444                        |
|           | [C19 = 3] | 31.239                        |
| Location  | A1        | .363                          |
|           | A2        | .368                          |
|           | A3        | .259                          |
|           | [B4=1]    | 29.112                        |
|           | [B4=2]    | 30.125                        |
|           | [B4=3]    | 27.998                        |
|           | [B4=4]    | .                             |
|           | [B5=1]    | 6.605                         |
|           | [B5=2]    | 7.090                         |
|           | [B5=3]    | 7.060                         |
|           | [B5=4]    | .                             |
|           | [B6=1]    | 2.604                         |
|           | [B6=2]    | 2.675                         |
|           | [B6=3]    | 9.545                         |
|           | [B6=4]    | .                             |
|           | [B7=1]    | .628                          |
|           | [B7=2]    | -.752                         |
|           | [B7=3]    | .716                          |
|           | [B7=4]    | .                             |
|           | [B8=1]    | 4.580                         |
|           | [B8=2]    | 4.821                         |
|           | [B8=3]    | 3.935                         |
|           | [B8=4]    | .                             |
|           | [B9=1]    | 3.078                         |
|           | [B9=2]    | 2.999                         |
|           | [B9=3]    | 4.232                         |
|           | [B9=4]    | .                             |
|           | [B10=1]   | 3.026                         |
|           | [B10=2]   | 1.897                         |
|           | [B10=3]   | .                             |
|           | [B11=1]   | 4.391                         |

### Parameter Estimates

|         | Estimate       | Std. Error | Wald  | df | Sig. | 95% ...<br>Lower Bound |
|---------|----------------|------------|-------|----|------|------------------------|
| [B11=2] | 1.486          | 1.235      | 1.448 | 1  | .229 | -.935                  |
| [B11=3] | 2.843          | 1.212      | 5.502 | 1  | .019 | .468                   |
| [B11=4] | 0 <sup>a</sup> | .          | .     | 0  | .    | .                      |
| [B12=1] | -.762          | 1.208      | .397  | 1  | .528 | -3.130                 |
| [B12=2] | -1.240         | 1.152      | 1.158 | 1  | .282 | -3.498                 |
| [B12=3] | 0 <sup>a</sup> | .          | .     | 0  | .    | .                      |
| [B12=4] | 0 <sup>a</sup> | .          | .     | 0  | .    | .                      |
| [B13=1] | -1.295         | .976       | 1.761 | 1  | .185 | -3.208                 |
| [B13=2] | -.762          | .898       | .720  | 1  | .396 | -2.522                 |
| [B13=3] | -.609          | .877       | .482  | 1  | .488 | -2.329                 |
| [B13=4] | 0 <sup>a</sup> | .          | .     | 0  | .    | .                      |
| [B14=1] | -3.376         | 1.975      | 2.922 | 1  | .087 | -7.246                 |
| [B14=2] | -3.071         | 1.856      | 2.738 | 1  | .098 | -6.709                 |
| [B14=3] | -2.346         | 1.798      | 1.703 | 1  | .192 | -5.870                 |
| [B14=4] | 0 <sup>a</sup> | .          | .     | 0  | .    | .                      |

### Parameter Estimates

|         | 95% Confidence .<br>Upper Bound |
|---------|---------------------------------|
| [B11=2] | 3.907                           |
| [B11=3] | 5.219                           |
| [B11=4] | .                               |
| [B12=1] | 1.607                           |
| [B12=2] | 1.018                           |
| [B12=3] | .                               |
| [B12=4] | .                               |
| [B13=1] | .618                            |
| [B13=2] | .998                            |
| [B13=3] | 1.111                           |
| [B13=4] | .                               |
| [B14=1] | .495                            |
| [B14=2] | .567                            |
| [B14=3] | 1.177                           |
| [B14=4] | .                               |

Link function: Logit.

- a. This parameter is set to zero because it is redundant.

```
PLUMC20 BY B4 B5 B6 B7 B8 B9 B10 B11 B12 B13 B14 WITHA1 A2 A3  
/CRITERIA=CIN(95) DELTA(0) LCONVERGE(0) MXITER(100) MXSTER(5) PCONVERGE(1.0E-6)  
SINGULAR(1.0E-8)  
/LINK=LOGIT  
/PRINT=FIT PARAMETERSUMMARY
```

## **PLUM - Ordinal Regression**

### **Warnings**

There are 321 (75.0%) cells (i.e., dependent variable levels by observed combinations of predictor variable values) with zero frequencies.

Unexpected singularities in the Fisher Information matrix are encountered. There may be a quasi-complete separation in the data. Some parameter estimates will tend to infinity.

The PLUM procedure continues despite the above warning(s). Subsequent results shown are based on the last iteration. Validity of the model fit is uncertain.

### Case Processing Summary

|                                                                                              |                     | N  | Marginal Percentage |
|----------------------------------------------------------------------------------------------|---------------------|----|---------------------|
| I acquired study skills as a result of my attendance in the SI sessions                      | To a great extent   | 38 | 35.5%               |
|                                                                                              | Fairly well         | 50 | 46.7%               |
|                                                                                              | To a limited extent | 15 | 14.0%               |
|                                                                                              | Not at all          | 4  | 3.7%                |
| The SI leaders' facilitation methods enhanced understanding of concepts                      | Strongly Agree      | 40 | 37.4%               |
|                                                                                              | Agree               | 63 | 58.9%               |
|                                                                                              | Disagree            | 3  | 2.8%                |
|                                                                                              | Strongly Disagree   | 1  | 0.9%                |
| The lecturer's attitude towards SI fostered my attendance of the SI sessions                 | Strongly Agree      | 27 | 25.2%               |
|                                                                                              | Agree               | 51 | 47.7%               |
|                                                                                              | Disagree            | 25 | 23.4%               |
|                                                                                              | Strongly Disagree   | 4  | 3.7%                |
| The scheduling of the SI sessions ensured availability and accessibility of the students     | Strongly Agree      | 35 | 32.7%               |
|                                                                                              | Agree               | 65 | 60.7%               |
|                                                                                              | Disagree            | 1  | 0.9%                |
|                                                                                              | Strongly Disagree   | 6  | 5.6%                |
| The monitoring of SI attendance by the lecturers encouraged my attendance to the SI sessions | Strongly Agree      | 29 | 27.1%               |
|                                                                                              | Agree               | 57 | 53.3%               |
|                                                                                              | Disagree            | 16 | 15.0%               |
|                                                                                              | Strongly Disagree   | 5  | 4.7%                |
| The student-SI leader relationship created an atmosphere conducive for learning              | Strongly Agree      | 35 | 32.7%               |
|                                                                                              | Agree               | 63 | 58.9%               |
|                                                                                              | Disagree            | 5  | 4.7%                |
|                                                                                              | Strongly Disagree   | 4  | 3.7%                |
| The session venues allowed space for peer collaboration and transactional learning           | Strongly Agree      | 41 | 38.3%               |
|                                                                                              | Agree               | 53 | 49.5%               |
|                                                                                              | Disagree            | 10 | 9.3%                |
|                                                                                              | Strongly Disagree   | 3  | 2.8%                |
| The SI sessions were characterised by engagement, sharing and exchange of ideas              | Strongly Agree      | 46 | 43.0%               |
|                                                                                              | Agree               | 57 | 53.3%               |
|                                                                                              | Disagree            | 4  | 3.7%                |
| The SI leader followed me up and kept track of my progress and performance                   | Strongly Agree      | 35 | 32.7%               |
|                                                                                              | Agree               | 35 | 32.7%               |
|                                                                                              | Disagree            | 29 | 27.1%               |
|                                                                                              | Strongly Disagree   | 8  | 7.5%                |

### Case Processing Summary

|                                                                  |                   | N   | Marginal Percentage |
|------------------------------------------------------------------|-------------------|-----|---------------------|
| The SI sessions focused on the mastery of the subject outcomes   | Strongly Agree    | 34  | 31.8%               |
|                                                                  | Agree             | 66  | 61.7%               |
|                                                                  | Disagree          | 6   | 5.6%                |
|                                                                  | Strongly Disagree | 1   | 0.9%                |
| My classmates encouraged me to attend SI sessions                | Strongly Agree    | 17  | 15.9%               |
|                                                                  | Agree             | 39  | 36.4%               |
|                                                                  | Disagree          | 32  | 29.9%               |
|                                                                  | Strongly Disagree | 19  | 17.8%               |
| My individual learning needs were accomodated in the SI sessions | Strongly Agree    | 33  | 30.8%               |
|                                                                  | Agree             | 59  | 55.1%               |
|                                                                  | Disagree          | 10  | 9.3%                |
|                                                                  | Strongly Disagree | 5   | 4.7%                |
| Valid                                                            |                   | 107 | 100.0%              |
| Missing                                                          |                   | 15  |                     |
| Total                                                            |                   | 122 |                     |

### Model Fitting Information

| Model          | -2 Log Likelihood | Chi-Square | df | Sig. |
|----------------|-------------------|------------|----|------|
| Intercept Only | 239.995           |            |    |      |
| Final          | 141.363           | 98.632     | 34 | .000 |

Link function: Logit.

### Goodness-of-Fit

|          | Chi-Square | df  | Sig.  |
|----------|------------|-----|-------|
| Pearson  | 236.608    | 284 | .981  |
| Deviance | 141.363    | 284 | 1.000 |

Link function: Logit.

### Pseudo R-Square

|               |      |
|---------------|------|
| Cox and Snell | .602 |
| Nagelkerke    | .674 |
| McFadden      | .411 |



Link function: Logit.

### Parameter Estimates

|           |           | Estimate       | Std. Error | Wald    | df | Sig. | 95% ...<br>Lower Bound |
|-----------|-----------|----------------|------------|---------|----|------|------------------------|
| Threshold | [C20 = 1] | -6.669         | 4.220      | 2.497   | 1  | .114 | -14.940                |
|           | [C20 = 2] | -2.210         | 4.070      | .295    | 1  | .587 | -10.187                |
|           | [C20 = 3] | 1.077          | 4.154      | .067    | 1  | .795 | -7.064                 |
| Location  | A1        | .292           | .271       | 1.160   | 1  | .281 | -.239                  |
|           | A2        | -.810          | .273       | 8.826   | 1  | .003 | -1.344                 |
|           | A3        | -.800          | .576       | 1.930   | 1  | .165 | -1.929                 |
|           | [B4=1]    | -18.310        | 3.620      | 25.579  | 1  | .000 | -25.406                |
|           | [B4=2]    | -17.825        | 3.522      | 25.618  | 1  | .000 | -24.728                |
|           | [B4=3]    | -18.567        | 3.652      | 25.847  | 1  | .000 | -25.725                |
|           | [B4=4]    | 0 <sup>a</sup> | .          | .       | 0  | .    | .                      |
|           | [B5=1]    | 2.105          | 2.325      | .820    | 1  | .365 | -2.453                 |
|           | [B5=2]    | 2.006          | 2.259      | .789    | 1  | .375 | -2.422                 |
|           | [B5=3]    | 2.971          | 2.281      | 1.697   | 1  | .193 | -1.499                 |
|           | [B5=4]    | 0 <sup>a</sup> | .          | .       | 0  | .    | .                      |
|           | [B6=1]    | 2.057          | 1.638      | 1.577   | 1  | .209 | -1.154                 |
|           | [B6=2]    | 1.682          | 1.473      | 1.303   | 1  | .254 | -1.206                 |
|           | [B6=3]    | 3.852          | 4.230      | .829    | 1  | .363 | -4.439                 |
|           | [B6=4]    | 0 <sup>a</sup> | .          | .       | 0  | .    | .                      |
|           | [B7=1]    | -1.241         | 1.602      | .599    | 1  | .439 | -4.381                 |
|           | [B7=2]    | -.920          | 1.513      | .370    | 1  | .543 | -3.886                 |
|           | [B7=3]    | -.423          | 1.681      | .063    | 1  | .801 | -3.717                 |
|           | [B7=4]    | 0 <sup>a</sup> | .          | .       | 0  | .    | .                      |
|           | [B8=1]    | 2.346          | 1.663      | 1.990   | 1  | .158 | -.914                  |
|           | [B8=2]    | 2.124          | 1.692      | 1.577   | 1  | .209 | -1.191                 |
|           | [B8=3]    | 2.164          | 1.959      | 1.220   | 1  | .269 | -1.676                 |
|           | [B8=4]    | 0 <sup>a</sup> | .          | .       | 0  | .    | .                      |
|           | [B9=1]    | 17.260         | 1.003      | 295.981 | 1  | .000 | 15.293                 |
|           | [B9=2]    | 18.236         | .872       | 437.327 | 1  | .000 | 16.527                 |
|           | [B9=3]    | 18.795         | .000       | .       | 1  | .    | 18.795                 |
|           | [B9=4]    | 0 <sup>a</sup> | .          | .       | 0  | .    | .                      |
|           | [B10=1]   | -3.760         | 1.897      | 3.928   | 1  | .047 | -7.478                 |
|           | [B10=2]   | -4.163         | 1.845      | 5.089   | 1  | .024 | -7.780                 |

## Parameter Estimates

|           |           | 95% Confidence |
|-----------|-----------|----------------|
|           |           | Upper Bound    |
| Threshold | [C20 = 1] | 1.602          |
|           | [C20 = 2] | 5.766          |
|           | [C20 = 3] | 9.218          |
| Location  | A1        | .823           |
|           | A2        | -.276          |
|           | A3        | .329           |
|           | [B4=1]    | -11.214        |
|           | [B4=2]    | -10.923        |
|           | [B4=3]    | -11.409        |
|           | [B4=4]    | .              |
|           | [B5=1]    | 6.663          |
|           | [B5=2]    | 6.435          |
|           | [B5=3]    | 7.441          |
|           | [B5=4]    | .              |
|           | [B6=1]    | 5.267          |
|           | [B6=2]    | 4.570          |
|           | [B6=3]    | 12.143         |
|           | [B6=4]    | .              |
|           | [B7=1]    | 1.900          |
|           | [B7=2]    | 2.046          |
|           | [B7=3]    | 2.871          |
|           | [B7=4]    | .              |
|           | [B8=1]    | 5.606          |
|           | [B8=2]    | 5.440          |
|           | [B8=3]    | 6.004          |
|           | [B8=4]    | .              |
|           | [B9=1]    | 19.226         |
|           | [B9=2]    | 19.946         |
|           | [B9=3]    | 18.795         |
|           | [B9=4]    | .              |
|           | [B10=1]   | -.042          |
|           | [B10=2]   | -.546          |

### Parameter Estimates

|         | Estimate       | Std. Error | Wald   | df | Sig. | 95% ...<br>Lower Bound |
|---------|----------------|------------|--------|----|------|------------------------|
| [B10=3] | 0 <sup>a</sup> | .          | .      | 0  | .    | .                      |
| [B11=1] | 2.093          | 1.358      | 2.375  | 1  | .123 | -.569                  |
| [B11=2] | 3.574          | 1.386      | 6.651  | 1  | .010 | .858                   |
| [B11=3] | 3.926          | 1.371      | 8.201  | 1  | .004 | 1.239                  |
| [B11=4] | 0 <sup>a</sup> | .          | .      | 0  | .    | .                      |
| [B12=1] | .026           | 1.226      | .000   | 1  | .983 | -2.376                 |
| [B12=2] | .285           | 1.144      | .062   | 1  | .803 | -1.957                 |
| [B12=3] | 0 <sup>a</sup> | .          | .      | 0  | .    | .                      |
| [B12=4] | 0 <sup>a</sup> | .          | .      | 0  | .    | .                      |
| [B13=1] | -1.017         | 1.043      | .952   | 1  | .329 | -3.061                 |
| [B13=2] | -.688          | .913       | .568   | 1  | .451 | -2.478                 |
| [B13=3] | -.084          | .911       | .009   | 1  | .926 | -1.870                 |
| [B13=4] | 0 <sup>a</sup> | .          | .      | 0  | .    | .                      |
| [B14=1] | -8.393         | 2.279      | 13.562 | 1  | .000 | -12.860                |
| [B14=2] | -6.170         | 2.129      | 8.397  | 1  | .004 | -10.344                |
| [B14=3] | -2.122         | 1.857      | 1.306  | 1  | .253 | -5.762                 |
| [B14=4] | 0 <sup>a</sup> | .          | .      | 0  | .    | .                      |

## Parameter Estimates

|         | 95% Confidence |
|---------|----------------|
|         | Upper Bound    |
| [B10=3] | .              |
| [B11=1] | 4.756          |
| [B11=2] | 6.290          |
| [B11=3] | 6.613          |
| [B11=4] | .              |
| [B12=1] | 2.429          |
| [B12=2] | 2.527          |
| [B12=3] | .              |
| [B12=4] | .              |
| [B13=1] | 1.026          |
| [B13=2] | 1.102          |
| [B13=3] | 1.702          |
| [B13=4] | .              |
| [B14=1] | -3.926         |
| [B14=2] | -1.997         |
| [B14=3] | 1.517          |
| [B14=4] | .              |

Link function: Logit.

- a. This parameter is set to zero because it is redundant.

```

PLUMC21 BY B4 B5 B6 B7 B8 B9 B10 B11 B12 B13 B14 WITHA1 A2 A3
/CRITERIA=CIN(95) DELTA(0) LCONVERGE(0) MXITER(100) MXSTER(5) PCONVERGE(1.0E-6)
SINGULAR(1.0E-8)
/LINK=LOGIT
/PRINT=FIT PARAMETERSUMMARY.
  
```

### PLUM - Ordinal Regression

## Warnings

There are 321 (75.0%) cells (i.e., dependent variable levels by observed combinations of predictor variable values) with zero frequencies.

Unexpected singularities in the Fisher Information matrix are encountered. There may be a quasi-complete separation in the data. Some parameter estimates will tend to infinity.

The PLUM procedure continues despite the above warning(s). Subsequent results shown are based on the last iteration. Validity of the model fit is uncertain.

## Case Processing Summary

|                                                                                                                    |                     | N  | Marginal Percentage |
|--------------------------------------------------------------------------------------------------------------------|---------------------|----|---------------------|
| SI sessions developed graduate attributes such as responsibility, independent learning, self-monitoring, et cetera | To a great extent   | 43 | 40.2%               |
|                                                                                                                    | Fairly well         | 50 | 46.7%               |
|                                                                                                                    | To a limited extent | 11 | 10.3%               |
|                                                                                                                    | Not at all          | 3  | 2.8%                |
| The SI leaders' facilitation methods enhanced understanding of concepts                                            | Strongly Agree      | 40 | 37.4%               |
|                                                                                                                    | Agree               | 63 | 58.9%               |
|                                                                                                                    | Disagree            | 3  | 2.8%                |
|                                                                                                                    | Strongly Disagree   | 1  | 0.9%                |
| The lecturer's attitude towards SI fostered my attendance of the SI sessions                                       | Strongly Agree      | 27 | 25.2%               |
|                                                                                                                    | Agree               | 51 | 47.7%               |
|                                                                                                                    | Disagree            | 25 | 23.4%               |
|                                                                                                                    | Strongly Disagree   | 4  | 3.7%                |
| The scheduling of the SI sessions ensured availability and accessibility of the students                           | Strongly Agree      | 35 | 32.7%               |
|                                                                                                                    | Agree               | 65 | 60.7%               |
|                                                                                                                    | Disagree            | 1  | 0.9%                |
|                                                                                                                    | Strongly Disagree   | 6  | 5.6%                |
| The monitoring of SI attendance by the lecturers encouraged my attendance to the SI sessions                       | Strongly Agree      | 29 | 27.1%               |
|                                                                                                                    | Agree               | 57 | 53.3%               |
|                                                                                                                    | Disagree            | 16 | 15.0%               |
|                                                                                                                    | Strongly Disagree   | 5  | 4.7%                |
| The student-SI leader relation ship created an atmosphere conducive for learning                                   | Strongly Agree      | 35 | 32.7%               |
|                                                                                                                    | Agree               | 63 | 58.9%               |
|                                                                                                                    | Disagree            | 5  | 4.7%                |
|                                                                                                                    | Strongly Disagree   | 4  | 3.7%                |

### Case Processing Summary

|                                                                                    |                   | N   | Marginal Percentage |
|------------------------------------------------------------------------------------|-------------------|-----|---------------------|
| The session venues allowed space for peer collaboration and transactional learning | Strongly Agree    | 41  | 38.3%               |
|                                                                                    | Agree             | 53  | 49.5%               |
|                                                                                    | Disagree          | 10  | 9.3%                |
|                                                                                    | Strongly Disagree | 3   | 2.8%                |
| The SI sessions were characterised by engagement, sharing and exchange of ideas    | Strongly Agree    | 46  | 43.0%               |
|                                                                                    | Agree             | 57  | 53.3%               |
|                                                                                    | Disagree          | 4   | 3.7%                |
| The SI leader followed me up and kept track of my progress and performance         | Strongly Agree    | 35  | 32.7%               |
|                                                                                    | Agree             | 35  | 32.7%               |
|                                                                                    | Disagree          | 29  | 27.1%               |
|                                                                                    | Strongly Disagree | 8   | 7.5%                |
| The SI sessions focused on the mastery of the subject outcomes                     | Strongly Agree    | 34  | 31.8%               |
|                                                                                    | Agree             | 66  | 61.7%               |
|                                                                                    | Disagree          | 6   | 5.6%                |
|                                                                                    | Strongly Disagree | 1   | 0.9%                |
| My classmates encouraged me to attend SI sessions                                  | Strongly Agree    | 17  | 15.9%               |
|                                                                                    | Agree             | 39  | 36.4%               |
|                                                                                    | Disagree          | 32  | 29.9%               |
|                                                                                    | Strongly Disagree | 19  | 17.8%               |
| My individual learning needs were accommodated in the SI sessions                  | Strongly Agree    | 33  | 30.8%               |
|                                                                                    | Agree             | 59  | 55.1%               |
|                                                                                    | Disagree          | 10  | 9.3%                |
|                                                                                    | Strongly Disagree | 5   | 4.7%                |
| Valid                                                                              |                   | 107 | 100.0%              |
| Missing                                                                            |                   | 15  |                     |
| Total                                                                              |                   | 122 |                     |

### Model Fitting Information

| Model          | -2 Log Likelihood | Chi-Square | df | Sig. |
|----------------|-------------------|------------|----|------|
| Intercept Only | 225.974           |            |    |      |
| Final          | 113.309           | 112.665    | 34 | .000 |

Link function: Logit.

### Goodness-of-Fit

|          | Chi-Square | df  | Sig.  |
|----------|------------|-----|-------|
| Pearson  | 158.980    | 284 | 1.000 |
| Deviance | 113.309    | 284 | 1.000 |

Link function: Logit.

### Pseudo R-Square

|               |      |
|---------------|------|
| Cox and Snell | .651 |
| Nagelkerke    | .741 |
| McFadden      | .499 |

Link function: Logit.

### Parameter Estimates

|           |           | Estimate       | Std. Error | Wald  | df | Sig.  | 95% ...<br>Lower Bound |
|-----------|-----------|----------------|------------|-------|----|-------|------------------------|
| Threshold | [C21 = 1] | -4.915         | 13257.479  | .000  | 1  | 1.000 | -25989.095             |
|           | [C21 = 2] | .429           | 13257.478  | .000  | 1  | 1.000 | -25983.752             |
|           | [C21 = 3] | 4.116          | 13257.478  | .000  | 1  | 1.000 | -25980.064             |
| Location  | A1        | -.635          | .320       | 3.933 | 1  | .047  | -1.262                 |
|           | A2        | -.665          | .299       | 4.935 | 1  | .026  | -1.252                 |
|           | A3        | -.488          | .664       | .540  | 1  | .462  | -1.789                 |
|           | [B4=1]    | 4.034          | 13257.480  | .000  | 1  | 1.000 | -25980.149             |
|           | [B4=2]    | 5.486          | 13257.480  | .000  | 1  | 1.000 | -25978.696             |
|           | [B4=3]    | 3.534          | 13257.480  | .000  | 1  | 1.000 | -25980.649             |
|           | [B4=4]    | 0 <sup>a</sup> | .          | .     | 0  | .     | .                      |
|           | [B5=1]    | -3.972         | 2.395      | 2.749 | 1  | .097  | -8.666                 |
|           | [B5=2]    | -4.819         | 2.348      | 4.212 | 1  | .040  | -9.420                 |
|           | [B5=3]    | -4.590         | 2.360      | 3.782 | 1  | .052  | -9.216                 |
|           | [B5=4]    | 0 <sup>a</sup> | .          | .     | 0  | .     | .                      |
|           | [B6=1]    | 3.178          | 2.177      | 2.132 | 1  | .144  | -1.088                 |
|           | [B6=2]    | 3.476          | 2.055      | 2.863 | 1  | .091  | -.551                  |
|           | [B6=3]    | -22.485        | .000       | .     | 1  | .     | -22.485                |
|           | [B6=4]    | 0 <sup>a</sup> | .          | .     | 0  | .     | .                      |
|           | [B7=1]    | -2.128         | 1.777      | 1.434 | 1  | .231  | -5.612                 |
|           | [B7=2]    | -2.149         | 1.663      | 1.670 | 1  | .196  | -5.408                 |
|           | [B7=3]    | -3.076         | 1.924      | 2.557 | 1  | .110  | -6.846                 |

## Parameter Estimates

|           |           | 95% Confidence . |
|-----------|-----------|------------------|
|           |           | Upper Bound      |
| Threshold | [C21 = 1] | 25979.266        |
|           | [C21 = 2] | 25984.609        |
|           | [C21 = 3] | 25988.296        |
| Location  | A1        | -.007            |
|           | A2        | -.078            |
|           | A3        | .813             |
|           | [B4=1]    | 25988.216        |
|           | [B4=2]    | 25989.669        |
|           | [B4=3]    | 25987.718        |
|           | [B4=4]    | .                |
|           | [B5=1]    | .723             |
|           | [B5=2]    | -.217            |
|           | [B5=3]    | .036             |
|           | [B5=4]    | .                |
|           | [B6=1]    | 7.444            |
|           | [B6=2]    | 7.503            |
|           | [B6=3]    | -22.485          |
|           | [B6=4]    | .                |
|           | [B7=1]    | 1.355            |
|           | [B7=2]    | 1.111            |
|           | [B7=3]    | .694             |



### Parameter Estimates

|         | Estimate       | Std. Error | Wald  | df | Sig. | 95% ...<br>Lower Bound |
|---------|----------------|------------|-------|----|------|------------------------|
| [B7=4]  | 0 <sup>a</sup> | .          | .     | 0  | .    | .                      |
| [B8=1]  | .035           | 2.076      | .000  | 1  | .986 | -4.035                 |
| [B8=2]  | 1.110          | 2.093      | .281  | 1  | .596 | -2.991                 |
| [B8=3]  | 1.429          | 2.480      | .332  | 1  | .564 | -3.431                 |
| [B8=4]  | 0 <sup>a</sup> | .          | .     | 0  | .    | .                      |
| [B9=1]  | 9.897          | 5.211      | 3.606 | 1  | .058 | -.318                  |
| [B9=2]  | 11.787         | 5.245      | 5.051 | 1  | .025 | 1.507                  |
| [B9=3]  | 11.057         | 5.293      | 4.363 | 1  | .037 | .682                   |
| [B9=4]  | 0 <sup>a</sup> | .          | .     | 0  | .    | .                      |
| [B10=1] | -11.398        | 3.946      | 8.343 | 1  | .004 | -19.132                |
| [B10=2] | -11.347        | 3.849      | 8.693 | 1  | .003 | -18.891                |
| [B10=3] | 0 <sup>a</sup> | .          | .     | 0  | .    | .                      |
| [B11=1] | -2.705         | 1.396      | 3.755 | 1  | .053 | -5.441                 |
| [B11=2] | -1.895         | 1.414      | 1.797 | 1  | .180 | -4.666                 |
| [B11=3] | -.770          | 1.362      | .320  | 1  | .572 | -3.439                 |
| [B11=4] | 0 <sup>a</sup> | .          | .     | 0  | .    | .                      |
| [B12=1] | -.511          | 1.416      | .130  | 1  | .718 | -3.287                 |
| [B12=2] | .055           | 1.349      | .002  | 1  | .968 | -2.590                 |
| [B12=3] | 0 <sup>a</sup> | .          | .     | 0  | .    | .                      |
| [B12=4] | 0 <sup>a</sup> | .          | .     | 0  | .    | .                      |
| [B13=1] | -1.026         | 1.150      | .797  | 1  | .372 | -3.279                 |
| [B13=2] | -1.757         | 1.039      | 2.862 | 1  | .091 | -3.793                 |
| [B13=3] | -1.915         | 1.045      | 3.359 | 1  | .067 | -3.964                 |
| [B13=4] | 0 <sup>a</sup> | .          | .     | 0  | .    | .                      |
| [B14=1] | -.227          | 2.212      | .011  | 1  | .918 | -4.562                 |
| [B14=2] | 1.827          | 2.120      | .742  | 1  | .389 | -2.329                 |
| [B14=3] | 2.427          | 2.067      | 1.380 | 1  | .240 | -1.623                 |
| [B14=4] | 0 <sup>a</sup> | .          | .     | 0  | .    | .                      |

## Parameter Estimates

|         | 95% Confidence<br>Upper Bound |
|---------|-------------------------------|
| [B7=4]  | .                             |
| [B8=1]  | 4.105                         |
| [B8=2]  | 5.211                         |
| [B8=3]  | 6.289                         |
| [B8=4]  | .                             |
| [B9=1]  | 20.111                        |
| [B9=2]  | 22.068                        |
| [B9=3]  | 21.432                        |
| [B9=4]  | .                             |
| [B10=1] | -3.664                        |
| [B10=2] | -3.804                        |
| [B10=3] | .                             |
| [B11=1] | .031                          |
| [B11=2] | .876                          |
| [B11=3] | 1.899                         |
| [B11=4] | .                             |
| [B12=1] | 2.265                         |
| [B12=2] | 2.699                         |
| [B12=3] | .                             |
| [B12=4] | .                             |
| [B13=1] | 1.227                         |
| [B13=2] | .278                          |
| [B13=3] | .133                          |
| [B13=4] | .                             |
| [B14=1] | 4.107                         |
| [B14=2] | 5.982                         |
| [B14=3] | 6.478                         |
| [B14=4] | .                             |

Link function: Logit.

a. This parameter is set to zero because it is redundant.

PLUM C18 BY B4 B5 B6 B7 B8 B9 B10 B11 B12 B13 B14 WITH A1 A2 A3

/CRITERIA=CIN(95) DELTA(0) LCONVERGE(0) MXITER(100) MXSTER(5) PCONVERGE(1.0E-6)  
SINGULAR(1.0E-8)

/LINK=LOGIT

/PRINT=FIT PARAMETERSUMMARY.

## PLUM - Ordinal Regression

### Warnings

There are 312 (75.0%) cells (i.e., dependent variable levels by observed combinations of predictor variable values) with zero frequencies.

Unexpected singularities in the Fisher Information matrix are encountered. There may be a quasi-complete separation in the data. Some parameter estimates will tend to infinity.

The PLUM procedure continues despite the above warning(s).  
Subsequent results shown are based on the last iteration.  
Validity of the model fit is uncertain.

### Case Processing Summary

|                                                                                                 |                     | N  | Marginal Percentage |
|-------------------------------------------------------------------------------------------------|---------------------|----|---------------------|
| The SI sessions offered a sense of community and belonging to the discipline and the university | To a great extent   | 30 | 28.8%               |
|                                                                                                 | Fairly well         | 54 | 51.9%               |
|                                                                                                 | To a limited extent | 19 | 18.3%               |
|                                                                                                 | Not at all          | 1  | 1.0%                |
| The SI leaders' facilitation methods enhanced understanding of concepts                         | Strongly Agree      | 39 | 37.5%               |
|                                                                                                 | Agree               | 61 | 58.7%               |
|                                                                                                 | Disagree            | 3  | 2.9%                |
|                                                                                                 | Strongly Disagree   | 1  | 1.0%                |
| The lecturer's attitude towards SI fostered my attendance of the SI sessions                    | Strongly Agree      | 27 | 26.0%               |
|                                                                                                 | Agree               | 51 | 49.0%               |
|                                                                                                 | Disagree            | 22 | 21.2%               |
|                                                                                                 | Strongly Disagree   | 4  | 3.8%                |
| The scheduling of the SI sessions ensured availability and accessibility of the students        | Strongly Agree      | 34 | 32.7%               |
|                                                                                                 | Agree               | 63 | 60.6%               |
|                                                                                                 | Disagree            | 1  | 1.0%                |
|                                                                                                 | Strongly Disagree   | 6  | 5.8%                |
| The monitoring of SI attendance by the lecturers encouraged my attendance to the SI sessions    | Strongly Agree      | 28 | 26.9%               |
|                                                                                                 | Agree               | 56 | 53.8%               |
|                                                                                                 | Disagree            | 15 | 14.4%               |
|                                                                                                 | Strongly Disagree   | 5  | 4.8%                |

### Case Processing Summary

|                                                                                    |                   | N   | Marginal Percentage |
|------------------------------------------------------------------------------------|-------------------|-----|---------------------|
| The student-SI leader relation ship created an atmosphere conducive for learning   | Strongly Agree    | 34  | 32.7%               |
|                                                                                    | Agree             | 62  | 59.6%               |
|                                                                                    | Disagree          | 4   | 3.8%                |
|                                                                                    | Strongly Disagree | 4   | 3.8%                |
| The session venues allowed space for peer collaboration and transactional learning | Strongly Agree    | 39  | 37.5%               |
|                                                                                    | Agree             | 52  | 50.0%               |
|                                                                                    | Disagree          | 10  | 9.6%                |
|                                                                                    | Strongly Disagree | 3   | 2.9%                |
| The SI sessions were characterised by engagement, sharing and exchange of ideas    | Strongly Agree    | 45  | 43.3%               |
|                                                                                    | Agree             | 55  | 52.9%               |
|                                                                                    | Disagree          | 4   | 3.8%                |
| The SI leader followed me up and kept track of my progress and performance         | Strongly Agree    | 34  | 32.7%               |
|                                                                                    | Agree             | 35  | 33.7%               |
|                                                                                    | Disagree          | 27  | 26.0%               |
|                                                                                    | Strongly Disagree | 8   | 7.7%                |
| The SI sessions focused on the mastery of the subject outcomes                     | Strongly Agree    | 33  | 31.7%               |
|                                                                                    | Agree             | 65  | 62.5%               |
|                                                                                    | Disagree          | 5   | 4.8%                |
|                                                                                    | Strongly Disagree | 1   | 1.0%                |
| My classmates encouraged me to attend SI sessions                                  | Strongly Agree    | 16  | 15.4%               |
|                                                                                    | Agree             | 38  | 36.5%               |
|                                                                                    | Disagree          | 31  | 29.8%               |
|                                                                                    | Strongly Disagree | 19  | 18.3%               |
| My individual learning needs were accomodated in the SI sessions                   | Strongly Agree    | 32  | 30.8%               |
|                                                                                    | Agree             | 58  | 55.8%               |
|                                                                                    | Disagree          | 9   | 8.7%                |
|                                                                                    | Strongly Disagree | 5   | 4.8%                |
| Valid                                                                              |                   | 104 | 100.0%              |
| Missing                                                                            |                   | 18  |                     |
| Total                                                                              |                   | 122 |                     |

### Model Fitting Information

| Model          | -2 Log Likelihood | Chi-Square | df | Sig. |
|----------------|-------------------|------------|----|------|
| Intercept Only | 219.263           |            |    |      |
| Final          | 156.498           | 62.765     | 34 | .002 |

Link function: Logit.

### Goodness-of-Fit

|          | Chi-Square | df  | Sig.  |
|----------|------------|-----|-------|
| Pearson  | 205.466    | 275 | .999  |
| Deviance | 156.498    | 275 | 1.000 |

Link function: Logit.

### Pseudo R-Square

|               |      |
|---------------|------|
| Cox and Snell | .453 |
| Nagelkerke    | .516 |
| McFadden      | .286 |

Link function: Logit.

### Parameter Estimates

|           |           | Estimate       | Std. Error | Wald    | df | Sig. | 95% ...<br>Lower Bound |
|-----------|-----------|----------------|------------|---------|----|------|------------------------|
| Threshold | [C18 = 1] | -9.884         | 4.571      | 4.675   | 1  | .031 | -18.843                |
|           | [C18 = 2] | -6.174         | 4.510      | 1.874   | 1  | .171 | -15.013                |
|           | [C18 = 3] | -1.969         | 4.310      | .209    | 1  | .648 | -10.417                |
| Location  | A1        | -.076          | .253       | .090    | 1  | .764 | -.571                  |
|           | A2        | .475           | .232       | 4.182   | 1  | .041 | .020                   |
|           | A3        | -.403          | .555       | .526    | 1  | .468 | -1.491                 |
|           | [B4=1]    | -28.464        | 4.043      | 49.555  | 1  | .000 | -36.389                |
|           | [B4=2]    | -28.006        | 3.958      | 50.068  | 1  | .000 | -35.764                |
|           | [B4=3]    | -30.882        | 4.127      | 55.982  | 1  | .000 | -38.971                |
|           | [B4=4]    | 0 <sup>a</sup> | .          | .       | 0  | .    | .                      |
|           | [B5=1]    | 1.003          | 2.263      | .196    | 1  | .658 | -3.433                 |
|           | [B5=2]    | 1.037          | 2.216      | .219    | 1  | .640 | -3.305                 |
|           | [B5=3]    | 1.979          | 2.236      | .783    | 1  | .376 | -2.404                 |
|           | [B5=4]    | 0 <sup>a</sup> | .          | .       | 0  | .    | .                      |
|           | [B6=1]    | .861           | 1.568      | .302    | 1  | .583 | -2.212                 |
|           | [B6=2]    | 2.645          | 1.450      | 3.325   | 1  | .068 | -.198                  |
|           | [B6=3]    | 1.392          | 3.938      | .125    | 1  | .724 | -6.327                 |
|           | [B6=4]    | 0 <sup>a</sup> | .          | .       | 0  | .    | .                      |
|           | [B7=1]    | -.949          | 1.614      | .346    | 1  | .557 | -4.114                 |
|           | [B7=2]    | -.933          | 1.543      | .366    | 1  | .545 | -3.957                 |
|           | [B7=3]    | -3.446         | 1.781      | 3.745   | 1  | .053 | -6.936                 |
|           | [B7=4]    | 0 <sup>a</sup> | .          | .       | 0  | .    | .                      |
|           | [B8=1]    | .439           | 1.548      | .080    | 1  | .777 | -2.596                 |
|           | [B8=2]    | .632           | 1.582      | .160    | 1  | .690 | -2.469                 |
|           | [B8=3]    | 5.212          | 2.110      | 6.102   | 1  | .014 | 1.077                  |
|           | [B8=4]    | 0 <sup>a</sup> | .          | .       | 0  | .    | .                      |
|           | [B9=1]    | 21.597         | .957       | 509.423 | 1  | .000 | 19.721                 |
|           | [B9=2]    | 21.879         | .854       | 655.722 | 1  | .000 | 20.204                 |
|           | [B9=3]    | 22.458         | .000       | .       | 1  | .    | 22.458                 |
|           | [B9=4]    | 0 <sup>a</sup> | .          | .       | 0  | .    | .                      |
|           | [B10=1]   | -3.783         | 2.028      | 3.478   | 1  | .062 | -7.758                 |
|           | [B10=2]   | -3.878         | 1.952      | 3.946   | 1  | .047 | -7.704                 |
|           | [B10=3]   | 0 <sup>a</sup> | .          | .       | 0  | .    | .                      |
|           | [B11=1]   | .993           | 1.246      | .636    | 1  | .425 | -1.448                 |

## Parameter Estimates

|           |           | 95% Confidence |
|-----------|-----------|----------------|
|           |           | Upper Bound    |
| Threshold | [C18 = 1] | -.924          |
|           | [C18 = 2] | 2.665          |
|           | [C18 = 3] | 6.479          |
| Location  | A1        | .419           |
|           | A2        | .930           |
|           | A3        | .686           |
|           | [B4=1]    | -20.539        |
|           | [B4=2]    | -20.249        |
|           | [B4=3]    | -22.792        |
|           | [B4=4]    | .              |
|           | [B5=1]    | 5.439          |
|           | [B5=2]    | 5.380          |
|           | [B5=3]    | 6.362          |
|           | [B5=4]    | .              |
|           | [B6=1]    | 3.935          |
|           | [B6=2]    | 5.487          |
|           | [B6=3]    | 9.111          |
|           | [B6=4]    | .              |
|           | [B7=1]    | 2.215          |
|           | [B7=2]    | 2.091          |
|           | [B7=3]    | .044           |
|           | [B7=4]    | .              |
|           | [B8=1]    | 3.474          |
|           | [B8=2]    | 3.733          |
|           | [B8=3]    | 9.348          |
|           | [B8=4]    | .              |
|           | [B9=1]    | 23.472         |
|           | [B9=2]    | 23.554         |
|           | [B9=3]    | 22.458         |
|           | [B9=4]    | .              |
|           | [B10=1]   | .193           |
|           | [B10=2]   | -.052          |
|           | [B10=3]   | .              |
|           | [B11=1]   | 3.434          |



### Parameter Estimates

|         | Estimate       | Std. Error | Wald  | df | Sig. | 95% ...<br>Lower Bound |
|---------|----------------|------------|-------|----|------|------------------------|
| [B11=2] | 1.110          | 1.270      | .764  | 1  | .382 | -1.379                 |
| [B11=3] | 1.540          | 1.231      | 1.563 | 1  | .211 | -.874                  |
| [B11=4] | 0 <sup>a</sup> | .          | .     | 0  | .    | .                      |
| [B12=1] | 1.628          | 1.306      | 1.555 | 1  | .212 | -.931                  |
| [B12=2] | 1.087          | 1.227      | .784  | 1  | .376 | -1.319                 |
| [B12=3] | 0 <sup>a</sup> | .          | .     | 0  | .    | .                      |
| [B12=4] | 0 <sup>a</sup> | .          | .     | 0  | .    | .                      |
| [B13=1] | -2.650         | 1.043      | 6.452 | 1  | .011 | -4.695                 |
| [B13=2] | -2.592         | .926       | 7.837 | 1  | .005 | -4.408                 |
| [B13=3] | -1.305         | .888       | 2.161 | 1  | .142 | -3.045                 |
| [B13=4] | 0 <sup>a</sup> | .          | .     | 0  | .    | .                      |
| [B14=1] | -1.118         | 1.999      | .312  | 1  | .576 | -5.036                 |
| [B14=2] | -1.549         | 1.893      | .669  | 1  | .413 | -5.259                 |
| [B14=3] | -1.582         | 1.870      | .715  | 1  | .398 | -5.247                 |
| [B14=4] | 0 <sup>a</sup> | .          | .     | 0  | .    | .                      |

### Parameter Estimates

|         | 95% Confidence .<br>Upper Bound |
|---------|---------------------------------|
| [B11=2] | 3.599                           |
| [B11=3] | 3.953                           |
| [B11=4] | .                               |
| [B12=1] | 4.188                           |
| [B12=2] | 3.492                           |
| [B12=3] | .                               |
| [B12=4] | .                               |
| [B13=1] | -.605                           |
| [B13=2] | -.777                           |
| [B13=3] | .435                            |
| [B13=4] | .                               |
| [B14=1] | 2.801                           |
| [B14=2] | 2.161                           |
| [B14=3] | 2.083                           |
| [B14=4] | .                               |



Link function: Logit.

- a. This parameter is set to zero because it is redundant.
